# Supplementary material for: R-2HG downregulates ERα to inhibit cholangiocarcinoma via the FTO/m6A-methylated ERα/miR16-5p/YAP1 signal pathway
Source: PubMed Central journal article supplement — Mol Ther Oncolytics. 2021 Jul 10;23:65–81. doi: 10.1016/j.omto.2021.06.017 (PMC8479483; doi:10.1016/j.omto.2021.06.017), 2021-07-10
Supplement: mmc1.pdf [file mmc1.pdf]

OMTO, Volume 23

## Supplemental information

**R-2HG downregulates ER $\alpha$  to inhibit  
cholangiocarcinoma via the FTO/m6A-methylated  
ER $\alpha$ /miR16-5p/YAP1 signal pathway**

**Yuan Gao, Xiwu Ouyang, Li Zuo, Yao Xiao, Yin Sun, Chawnshang Chang, Xihu Qin, and Shuyuan Yeh**

**Supplementary Fig. S1.** (A) ER $\alpha$  expression in QBC939 and HuCCT1 cell lines. (B) MTT assay analyzed cell growth after over-expressing ER $\alpha$  in HuCCT1 cells. (C) MTT assay analyzed cell growth after knocking down ER $\alpha$  with shER $\alpha$ #1 or shER $\alpha$ #2 in QBC939 cells. (D-E) MTT assay of estrogen promoted cell proliferation in HuCCT1 (D), and estrogen antagonist (MPP) inhibited cell growth in QBC939 cells (E). Quantitations are presented as mean  $\pm$  SD. \*  $P < 0.05$ .

**Supplementary Fig. S2.** (A) YAP1 expression in HuCCT1 cells treated with DMSO or R-2HG. (B) YAP1 expression in QBC939 cells carrying IDH1 wild-type (WT) or mutant (MT). (C) After over-expressing (oe) YAP1 in QBC939 cells, MTT assay was conducted to detect cell proliferation. (D) After knocking down YAP1 (shYAP1#1 and YAP1#2) in QBC939 cells, MTT assay was conducted to detect cell proliferation. Quantitations are presented as mean  $\pm$  SD. \*\*  $P < 0.01$ .

**Supplementary Fig. S3.** (A-B) Western blot assay was performed on QBC939 cells transfected with pLKO or shER $\alpha$  (A), and HuCCT1 cells transfected with pWPI or oeER $\alpha$  (B). (C) The qRT-PCR assay was performed on QBC939 cells transfected with Ctrl or miR16-5p inhibitor (right), and HuCCT1 cells transfected with pLKO or oemiR16-5p (left). (D) Cell proliferation and YAP1 expression altered after manipulating miR16-5p. Quantitations are presented as mean  $\pm$  SD. \*  $P < 0.05$ , \*\*  $P < 0.01$ .

**Supplementary Fig. S4.** (A) The ER $\alpha$  mRNA level was detected in Argonaute 2 (Ago2) complex using RIP assay in QBC939 cells with/without (w/wo) IDH1<sup>R132H</sup>. (B) ER $\alpha$  protein stability test in cycloheximide, CHX treated QBC939 cells carrying the IDH1 wild-type (WT) or mutation (MT). (C) After ER $\alpha$ -biotin pull-down, qRT-PCR was conducted to examine ER $\alpha$  expression from ER $\alpha$ -biotin complex. (D) After treating QBC939 cells w/wo R-2HG, anti-m6A antibody was used to pull-down the total m6A methylated RNA from two groups (E) The ER $\alpha$  mRNA level was detected in the anti-m6A complex using RIP assay in QBC939 cells carrying IDH1 WT or MT. (F) After over-expressing FTO (oeFTO) in HuCCT1 cells, MTT was conducted to examine cell growth. (G) After shRNA knockdown of FTO (shFTO#1, left, and shFTO#2, right) in QBC939 cells, MTT assay was conducted to examine cell growth. (H) The ER $\alpha$  mRNA sequence alignment near the stop codons with wild-type versus mutant of potential m6A modification sites. Quantitations are presented as mean  $\pm$  SD. \*  $P < 0.05$  and \*\*  $P < 0.01$ .

Table S1. Clinical data of Cholangiocarcinoma from TCGA

| sampleID            | gender | _EVENT | OS.time | histological_type                   | idh1/2<br>mutatio<br>n | Amino_A<br>cid_chan<br>ge | neoplasm_h<br>istologic_gr<br>ade | patho<br>logic_<br>M | patho<br>logic_<br>N | patho<br>logic_<br>T | patholo<br>gic_sta<br>ge | Er<br>α            | HIF-1<br>α          | GJA1                |
|---------------------|--------|--------|---------|-------------------------------------|------------------------|---------------------------|-----------------------------------|----------------------|----------------------|----------------------|--------------------------|--------------------|---------------------|---------------------|
| TCGA-3X-AAV<br>9-01 | MALE   | dead   | 339     | Cholangiocarcinoma; intrahepatic    | no                     | no                        | G2                                | M0                   | N0                   | T1                   | Stage I                  | 6.5<br>13<br>6     | 13.20<br>1205<br>01 | 11.60<br>3626<br>34 |
| TCGA-3X-AAV<br>A-01 | FEMALE | dead   | 445     | Cholangiocarcinoma; intrahepatic    | IDH2                   | p.R172S                   | G2                                | M0                   | NX                   | T2b                  | Stage II                 | 4.0<br>88<br>2     | 12.55<br>8659<br>87 | 9.682<br>9945<br>84 |
| TCGA-3X-AAV<br>B-01 | FEMALE | alive  | 402     | Cholangiocarcinoma; distal          | no                     | no                        | G1                                | M1                   | N1                   | T3                   | Stage<br>IVB             | 5.6<br>32<br>9     | 13.44<br>5920<br>13 | 12.46<br>6841<br>21 |
| TCGA-3X-AAV<br>C-01 | FEMALE | alive  | 709     | Cholangiocarcinoma; hilar/perihilar | no                     | no                        | G3                                | M0                   | N0                   | T1                   | Stage I                  | 3.1<br>97<br>8     | 11.84<br>5097<br>96 | 13.64<br>4982<br>86 |
| TCGA-3X-AAVE<br>-01 | MALE   | alive  | 650     | Cholangiocarcinoma; intrahepatic    | no                     | no                        | G2                                | M0                   | N0                   | T2                   | Stage II                 | 5.5<br>53<br>9     | 12.86<br>0505<br>06 | 9.491<br>8530<br>96 |
| TCGA-4G-AAZ<br>O-01 | FEMALE | alive  | 1177    | Cholangiocarcinoma; intrahepatic    | no                     | no                        | G2                                | M0                   | N0                   | T2a                  | Stage II                 | 2.8<br>10<br>2     | 12.61<br>6778<br>55 | 11.56<br>1287<br>95 |
| TCGA-4G-AAZ<br>T-01 | MALE   | alive  | 420     | Cholangiocarcinoma; intrahepatic    | no                     | no                        | G2                                | M0                   | N0                   | T1                   | Stage I                  | 10.68<br>3.6<br>49 | 10.94<br>4748<br>62 | 10.94<br>5443<br>84 |
| TCGA-W5-AA2<br>G-01 | FEMALE | alive  | 1976    | Cholangiocarcinoma; intrahepatic    | IDH1                   | p.R132C                   | G3                                | M0                   | N0                   | T1                   | Stage I                  | 7.6<br>75<br>7     | 12.48<br>6583<br>66 | 9.087<br>4628<br>41 |
| TCGA-W5-AA2<br>H-01 | FEMALE | alive  | 1077    | Cholangiocarcinoma; distal          | no                     | no                        | G3                                | M0                   | N0                   | T3                   | Stage<br>III             | 6.7<br>43<br>43    | 11.73<br>2167<br>43 | 9.906<br>8905<br>96 |
| TCGA-W5-AA2I<br>-01 | MALE   | dead   | 1939    | Cholangiocarcinoma; intrahepatic    | no                     | no                        | G2                                | M0                   | N0                   | T1                   | Stage I                  | 3.8<br>89<br>7     | 11.25<br>8566<br>03 | 6.672<br>4253<br>42 |

|             |        |       |      |                                         |      |         |    |    |    |     |              |     |       |       |
|-------------|--------|-------|------|-----------------------------------------|------|---------|----|----|----|-----|--------------|-----|-------|-------|
| TCGA-W5-AA2 |        |       |      |                                         |      |         |    |    |    |     |              | 6.0 | 12.65 | 8.569 |
| O-01        | MALE   | dead  | 640  | Cholangiocarcinom<br>a; intrahepatic    | IDH1 | p.R132C | G3 | M0 | N0 | T1  | Stage I      | 11  | 6871  | 8556  |
|             |        |       |      |                                         |      |         |    |    |    |     |              | 4   | 73    | 08    |
| TCGA-W5-AA2 |        |       |      |                                         |      |         |    |    |    |     |              | 3.5 | 13.83 | 10.34 |
| Q-01        | MALE   | alive | 50   | Cholangiocarcinom<br>a; intrahepatic    | no   | no      | G2 | M0 | N0 | T2b | Stage II     | 88  | 4471  | 4295  |
|             |        |       |      |                                         |      |         |    |    |    |     |              | 7   | 05    | 91    |
| TCGA-W5-AA2 |        |       |      |                                         |      |         |    |    |    |     |              | 5.2 | 12.58 | 9.231 |
| R-01        | FEMALE | alive | 1542 | Cholangiocarcinom<br>a; intrahepatic    | no   | no      | G3 | M0 | N0 | T1  | Stage I      | 30  | 3552  | 2211  |
|             |        |       |      |                                         |      |         |    |    |    |     |              | 5   | 93    | 81    |
| TCGA-W5-AA2 |        |       |      |                                         |      |         |    |    |    |     |              | 2.4 | 12.23 | 8.672 |
| T-01        | FEMALE | dead  | 1220 | Cholangiocarcinom<br>a; intrahepatic    | no   | no      | G3 | M0 | N0 | T2  | Stage II     | 21  | 9598  | 4253  |
|             |        |       |      |                                         |      |         |    |    |    |     |              | 8   | 53    | 42    |
| TCGA-W5-AA2 |        |       |      |                                         |      |         |    |    |    |     |              | 4.2 | 13.25 | 10.32 |
| U-01        | FEMALE | dead  | 627  | Cholangiocarcinom<br>a; intrahepatic    | no   | no      | G3 | M0 | N0 | T1  | Stage I      | 13  | 5766  | 3054  |
|             |        |       |      |                                         |      |         |    |    |    |     |              | 6   | 26    | 76    |
| TCGA-W5-AA2 |        |       |      |                                         |      |         |    |    |    |     |              | 2.8 | 14.17 | 9.172 |
| W-01        | FEMALE | dead  | 924  | Cholangiocarcinom<br>a; intrahepatic    | no   | no      | G3 | M0 | N1 | T2a | Stage<br>IVA | 86  | 6406  | 4275  |
|             |        |       |      |                                         |      |         |    |    |    |     |              | 7   | 93    | 09    |
| TCGA-W5-AA2 |        |       |      |                                         |      |         |    |    |    |     |              | 6.2 | 12.45 | 11.55 |
| X-01        | MALE   | dead  | 271  | Cholangiocarcinom<br>a; hilar/perihilar | no   | no      | G4 | M1 | N1 | T2b | Stage<br>IVB | 76  | 9431  | 0265  |
|             |        |       |      |                                         |      |         |    |    |    |     |              | 9   | 62    | 81    |
| TCGA-W5-AA2 |        |       |      |                                         |      |         |    |    |    |     |              | 4.2 | 14.41 | 10.72 |
| Z-01        | FEMALE | alive | 1614 | Cholangiocarcinom<br>a; intrahepatic    | no   | no      | G3 | M0 | N0 | T2  | Stage II     | 34  | 7193  | 7069  |
|             |        |       |      |                                         |      |         |    |    |    |     |              |     | 24    | 56    |
| TCGA-W5-AA3 |        |       |      |                                         |      |         |    |    |    |     |              | 4.6 | 12.20 | 10.38 |
| 0-01        | MALE   | alive | 1153 | Cholangiocarcinom<br>a; intrahepatic    | no   | no      | G3 | M0 | N0 | T1  | Stage I      | 96  | 5182  | 1542  |
|             |        |       |      |                                         |      |         |    |    |    |     |              | 4   | 33    | 95    |
| TCGA-W5-AA3 |        |       |      |                                         |      |         |    |    |    |     |              | 6.7 | 13.08 | 10.36 |
| 1-01        | MALE   | alive | 10   | Cholangiocarcinom<br>a; intrahepatic    | no   | no      | G3 | M0 | N0 | T1  | Stage I      | 89  | 8622  | 9597  |
|             |        |       |      |                                         |      |         |    |    |    |     |              | 2   | 63    | 35    |
| TCGA-W5-AA3 |        |       |      |                                         |      |         |    |    |    |     |              | 6.4 | 13.45 | 10.77 |
| 3-01        | MALE   | alive | 1449 | Cholangiocarcinom<br>a; intrahepatic    | no   | no      | G3 | M0 | N0 | T1  | Stage I      | 72  | 5584  | 6433  |
|             |        |       |      |                                         |      |         |    |    |    |     |              | 5   | 09    | 03    |

|                     |        |       |      |                                     |      |         |    |    |    |     |           |     |       |       |
|---------------------|--------|-------|------|-------------------------------------|------|---------|----|----|----|-----|-----------|-----|-------|-------|
| TCGA-W5-AA3<br>4-01 | FEMALE | dead  | 555  | Cholangiocarcinoma; intrahepatic    | IDH1 | p.R132C | G2 | M0 | N0 | T1  | Stage I   | 3.2 | 11.94 | 8.930 |
|                     |        |       |      |                                     |      |         |    |    |    |     |           | 82  | 3247  | 7373  |
|                     |        |       |      |                                     |      |         |    |    |    |     |           |     | 4     | 38    |
| TCGA-W5-AA3<br>6-01 | FEMALE | dead  | 1402 | Cholangiocarcinoma; hilar/perihilar | IDH1 | p.R132S | G3 | M1 | N0 | T3  | Stage IV  | 1.9 | 11.94 | 8.980 |
|                     |        |       |      |                                     |      |         |    |    |    |     |           | 56  | 6175  | 1395  |
|                     |        |       |      |                                     |      |         |    |    |    |     |           | 1   | 24    | 78    |
| TCGA-W5-AA3<br>8-01 | FEMALE | alive | 1471 | Cholangiocarcinoma; intrahepatic    | no   | no      | G3 | M0 | N0 | T1  | Stage I   | 3.3 | 13.41 | 8.335 |
|                     |        |       |      |                                     |      |         |    |    |    |     |           | 62  | 2040  | 3903  |
|                     |        |       |      |                                     |      |         |    |    |    |     |           |     | 51    | 55    |
| TCGA-W5-AA3<br>9-01 | MALE   | dead  | 170  | Cholangiocarcinoma; intrahepatic    | no   | no      | G4 | M0 | N0 | T2  | Stage II  | 4.7 | 10.74 | 7.851 |
|                     |        |       |      |                                     |      |         |    |    |    |     |           | 95  | 1466  | 7490  |
|                     |        |       |      |                                     |      |         |    |    |    |     |           | 7   | 99    | 41    |
| TCGA-W6-AA0<br>S-01 | FEMALE | alive | 808  | Cholangiocarcinoma; intrahepatic    | no   | no      | G2 | MX | N0 | T1  | Stage I   | 3.8 | 14.58 | 9.887 |
|                     |        |       |      |                                     |      |         |    |    |    |     |           | 82  | 3141  | 2206  |
|                     |        |       |      |                                     |      |         |    |    |    |     |           | 2   | 55    | 15    |
| TCGA-WD-A7R<br>X-01 | FEMALE | dead  | 21   | Cholangiocarcinoma; intrahepatic    | no   | no      | G2 | MX | NX | T2b | Stage II  | 6.6 | 12.58 | 9.519 |
|                     |        |       |      |                                     |      |         |    |    |    |     |           | 18  | 5432  | 6362  |
|                     |        |       |      |                                     |      |         |    |    |    |     |           | 3   | 05    | 53    |
| TCGA-YR-A95A<br>-01 | MALE   | dead  | 26   | Cholangiocarcinoma; hilar/perihilar | IDH1 | p.R132C | G2 | M1 | NX | T2  | Stage IV  | 3.0 | 13.26 | 13.87 |
|                     |        |       |      |                                     |      |         |    |    |    |     |           | 6.0 | 8103  | 6708  |
|                     |        |       |      |                                     |      |         |    |    |    |     |           | 73  | 34    | 78    |
| TCGA-ZD-A8I3<br>-01 | FEMALE | dead  | 169  | Cholangiocarcinoma; intrahepatic    | no   | no      | G3 | M0 | N0 | T2  | Stage II  | 3.0 | 13.67 | 10.20 |
|                     |        |       |      |                                     |      |         |    |    |    |     |           | 49  | 3198  | 8234  |
|                     |        |       |      |                                     |      |         |    |    |    |     |           | 9   | 64    | 36    |
| TCGA-ZH-A8Y1<br>-01 | FEMALE | dead  | 385  | Cholangiocarcinoma; intrahepatic    | no   | no      | G2 | M0 | N1 | T3  | Stage IVA | 3.4 | 13.45 | 10.83 |
|                     |        |       |      |                                     |      |         |    |    |    |     |           | 00  | 9303  | 7627  |
|                     |        |       |      |                                     |      |         |    |    |    |     |           | 2   | 53    | 93    |
| TCGA-ZH-A8Y2<br>-01 | FEMALE | dead  | 701  | Cholangiocarcinoma; intrahepatic    | no   | no      | G2 | M0 | NX | T1  | Stage I   | 3.3 | 12.48 | 8.087 |
|                     |        |       |      |                                     |      |         |    |    |    |     |           | 83  | 0032  | 4628  |
|                     |        |       |      |                                     |      |         |    |    |    |     |           | 4   | 81    | 41    |
| TCGA-ZH-A8Y4<br>-01 | MALE   | dead  | 741  | Cholangiocarcinoma; intrahepatic    | no   | no      | G3 | M0 | N0 | T1  | Stage I   | 4.7 | 13.75 | 8.851 |
|                     |        |       |      |                                     |      |         |    |    |    |     |           | 11  | 4365  | 7490  |
|                     |        |       |      |                                     |      |         |    |    |    |     |           | 2   | 6     | 41    |
| TCGA-ZH-A8Y5<br>-01 | MALE   | alive | 1229 | Cholangiocarcinoma; intrahepatic    | no   | no      | G3 | M1 | N1 | T3  | Stage IVB | 2.9 | 13.15 | 9.933 |
|                     |        |       |      |                                     |      |         |    |    |    |     |           | 71  | 1967  | 6906  |

|                   |        |       |     |                                  |    |    |    |    |    |     |             |                |                      |                      |
|-------------------|--------|-------|-----|----------------------------------|----|----|----|----|----|-----|-------------|----------------|----------------------|----------------------|
|                   |        |       |     |                                  |    |    |    |    |    |     |             |                | 87                   | 55                   |
| TCGA-ZH-A8Y6-01   | FEMALE | alive | 519 | Cholangiocarcinoma; intrahepatic | no | no | G2 | M0 | N0 | T1  | Stage I     | 5.1<br>35<br>4 | 16.03<br>8404<br>63  | 10.16<br>4906<br>93  |
| TCGA-ZH-A8Y8-01   | MALE   | alive | 602 | Cholangiocarcinoma; intrahepatic | no | no | G2 | M0 | N0 | T1  | Stage I     | 5.3<br>54<br>7 | 12.81<br>4782<br>72  | 14.20<br>3271<br>52  |
| TCGA-ZU-A8S4-01   | MALE   | dead  | 98  | Cholangiocarcinoma; intrahepatic | no | no | G3 | MX | NX | T1  | Stage I     | 4.6<br>39<br>9 | 13.30<br>4636<br>52  | 13.78<br>0334<br>71  |
| TCGA-UB-A7M A-01A | female | alive |     | Hepatobiliary carcinoma (Mixed)  | no | no | G2 | M0 | N0 | T2b | stage ii    | 5.8<br>83<br>6 | #N/A<br>#N/A<br>#N/A | #N/A<br>#N/A<br>#N/A |
| TCGA-ED-A97K-01A  | male   | alive | 6   | Hepatobiliary carcinoma (Mixed)  | no | no | G2 | M0 | N0 | T3a | stage iiiia | 7.1<br>39<br>3 | #N/A<br>#N/A<br>#N/A | #N/A<br>#N/A<br>#N/A |
| TCGA-K7-AAU 7-01A | male   | alive | 359 | Hepatobiliary carcinoma (Mixed)  | no | no | G2 | MX | NX | T2a | stage ii    | 4.9<br>41<br>8 | #N/A<br>#N/A<br>#N/A | #N/A<br>#N/A<br>#N/A |
| TCGA-DD-AA3 A-01A | female | dead  | 410 | Hepatobiliary carcinoma (Mixed)  | no | no | G4 | MX | N0 | T1  | stage i     | 3.4<br>23<br>3 | #N/A<br>#N/A<br>#N/A | #N/A<br>#N/A<br>#N/A |
| TCGA-5C-AAP D-01A | male   | alive | 20  | Hepatobiliary carcinoma (Mixed)  | no | no | G1 | M0 | N0 | T2  | stage ii    | 4.9<br>09<br>4 | #N/A<br>#N/A<br>#N/A | #N/A<br>#N/A<br>#N/A |
| TCGA-FV-A310-01A  | female | alive | 848 | Hepatobiliary carcinoma (Mixed)  | no | no | G2 | M0 | NX | T2  | stage ii    | 2.8<br>99      | #N/A<br>#N/A         | #N/A<br>#N/A         |
| TCGA-KR-A7K2-01A  | male   | alive |     | Hepatobiliary carcinoma (Mixed)  | no | no | G1 | M0 | N0 | T1  | stage i     | 8.7<br>35<br>3 | #N/A<br>#N/A<br>#N/A | #N/A<br>#N/A<br>#N/A |

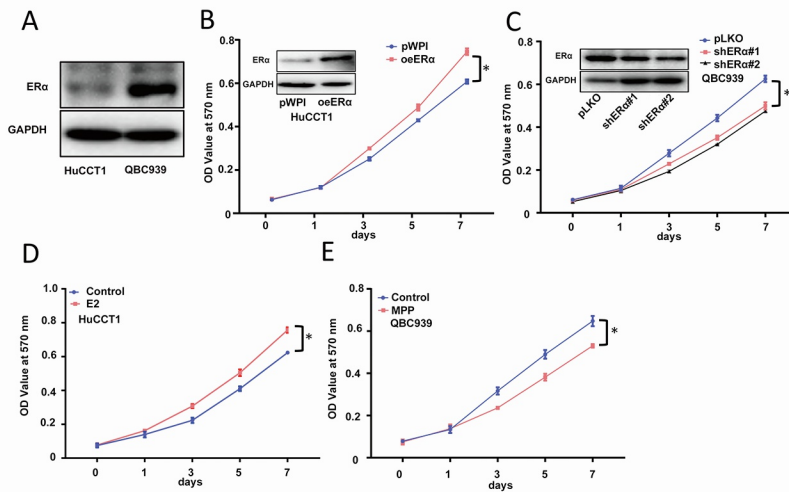

Supplementary Figure 1

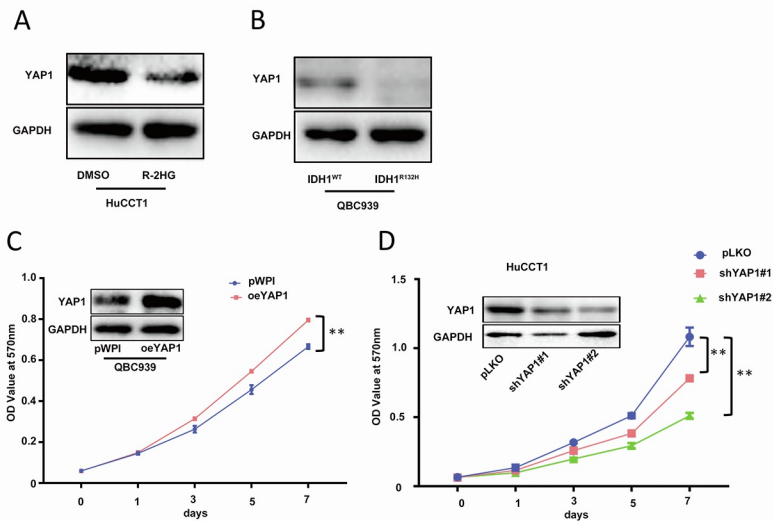

Supplementary Figure 2



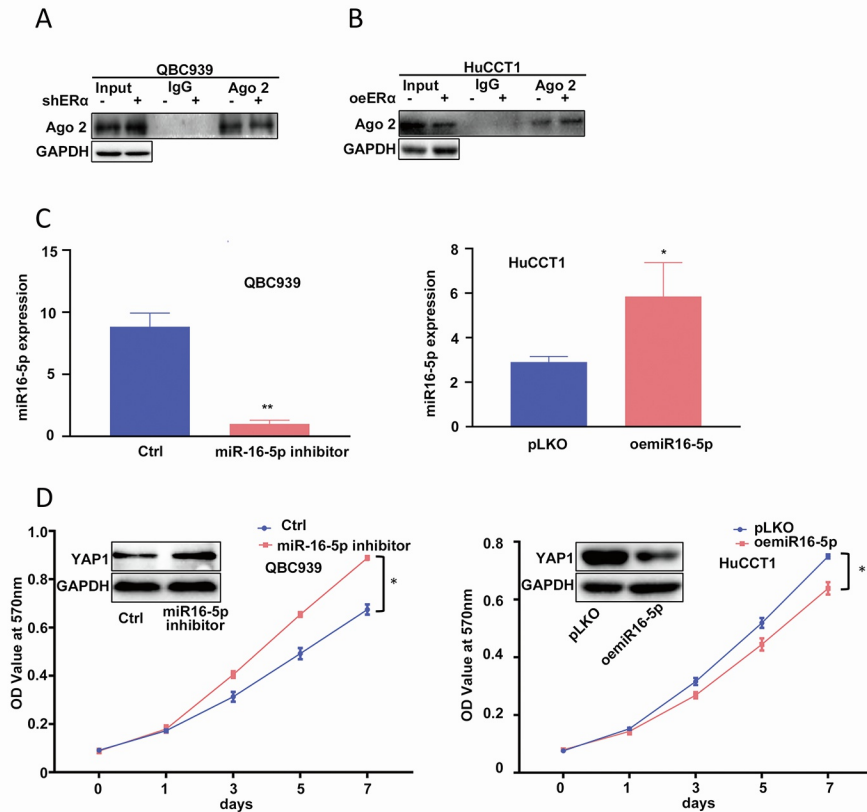

Supplementary Figure 3

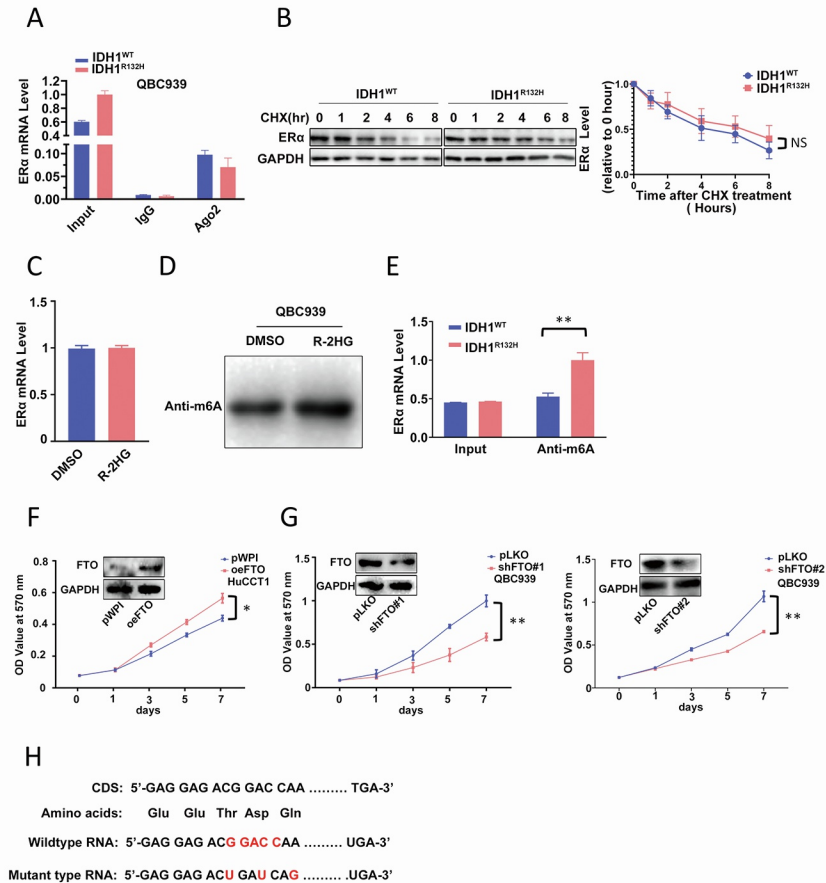

Supplementary Figure 4
