# Supplementary material for: R-2HG downregulates ERα to inhibit cholangiocarcinoma via the FTO/m6A-methylated ERα/miR16-5p/YAP1 signal pathway
Source: PubMed Central journal article supplement — Mol Ther Oncolytics. 2021 Jul 10;23:65–81. doi: 10.1016/j.omto.2021.06.017 (PMC8479483; doi:10.1016/j.omto.2021.06.017), 2021-07-10
Supplement: mmc2.pdf [file mmc2.pdf]

# R-2HG downregulates ER $\alpha$ to inhibit cholangiocarcinoma via the FTO/m6A-methylated ER $\alpha$ /miR16-5p/YAP1 signal pathway

Yuan Gao,<sup>1,2</sup> Xiwu Ouyang,<sup>2,3</sup> Li Zuo,<sup>1</sup> Yao Xiao,<sup>2,3</sup> Yin Sun,<sup>2</sup> Chawnsang Chang,<sup>2</sup> Xihu Qin,<sup>1</sup> and Shuyuan Yeh<sup>2</sup>

<sup>1</sup>Department of Hepato-Biliary-Pancreatic Surgery, The Affiliated Changzhou No. 2 People's Hospital of Nanjing Medical University, Changzhou, Jiangsu 213003, China; <sup>2</sup>George Whipple Lab for Cancer Research, Departments of Urology, Pathology, and Radiation Oncology, and The Wilmot Cancer Institute, University of Rochester Medical Center, Rochester, NY 14642, USA; <sup>3</sup>Department of General Surgery, Xiangya Hospital, Central South University, Changsha 410008, China

**Isocitrate dehydrogenase (IDH) mutations increase (R)-2-hydroxyglutarate (R-2HG) production; however, functional mechanisms of R-2HG in regulating cholangiocarcinoma (CCA) development remain to be further investigated. We first applied the CRISPR-Cas9 gene-editing system to create IDH1R132H-mutated CCA cells. Interestingly, our data showed that R-2HG could function through downregulating estrogen receptor alpha (ER $\alpha$ ) and Yes-associated protein 1 (YAP1) pathways to decrease CCA growth. Detailed mechanistic studies revealed that R-2HG could target and degrade the fat mass and obesity-associated protein (FTO), the first identified mRNA demethylase. This reduced FTO can increase the N<sup>6</sup>-methyladenosine (m6A) to methylate the mRNA of ER $\alpha$ , and consequently decrease protein translation of the ER $\alpha$ . Further mechanistic studies revealed that ER $\alpha$  could transcriptionally suppress miR-16-5p expression, which could then increase YAP1 expression due to the reduced miR-16-5p binding to the 3' UTR of YAP1. Furthermore, data from the pre-clinical animal model with implantation of IDH1R132H QBC939 cells demonstrated that R-2HG generated by the IDH1 mutation could downregulate ER $\alpha$  and YAP1 to suppress CCA tumor growth. Taken together, our new findings suggested that IDH1 mutation-induced R-2HG could suppress CCA growth via regulating the FTO/m6A-methylated ER $\alpha$ /miR16-5p/YAP1 signaling pathway. Upregulating R-2HG or downregulating the ER $\alpha$  signal by short hairpin RNA ER $\alpha$  (shER $\alpha$ ) or antiestrogen could be effective strategies to inhibit CCA.**

## INTRODUCTION

Cholangiocarcinoma (CCA) arises from malignant growth of the epithelial lining of bile ducts and represents the second most common primary liver malignancy.<sup>1</sup> Based on anatomical criteria, CCA can be subtyped as intrahepatic CCA (ICC) and extrahepatic CCA (ECC).<sup>2</sup> Painless jaundice is the main reason for the first doctor visits for CCA patients. The poor prognosis and low median survival time (approximately 1 year) are its main characteristics.<sup>3–5</sup> Complete surgical resection with histological negative resection margins and liver transplantation are still considered as the mainstay of curative treat-

ment.<sup>1,2,6</sup> According to recently reported data, even though the mortality of ECC has leveled off, the incidence and mortality of ICC are still increasing worldwide.<sup>7,8</sup> Due to improved understanding of molecular mechanisms and pathogenesis, a growing body of evidence has shown specific gene derangements that could contribute to the development of carcinogenesis. Also, several genetic mutation profiles in CCA have been identified.<sup>9,10</sup> Among these gene derangements, the isocitrate dehydrogenase 1/2 (IDH1/2) mutations were identified in glioma, acute myeloid leukemia (AML), chondrosarcomas, and CCA, suggesting an important role of the IDH1/2 mutations in the occurrence and prognosis of CCA.<sup>11–14</sup> IDH1/2 play important roles in the tricarboxylic acid (TCA) cycle. Subsequent findings showed that IDH1/2 could increase (R)-2-hydroxyglutarate (R-2HG), which leads to inhibiting the classic alpha-ketoglutarate ( $\alpha$ -KG)-dependent dioxygenases involved in epigenetic regulation, extracellular matrix maturation, and cell signaling. Functional studies also uncovered that R-2HG promoted carcinogenesis and may be regarded as an oncometabolite.<sup>15–18</sup> Interestingly, after surgical resection, CCA patients with IDH1/2 mutations tend to have better overall survival than do those without IDH1/2 mutations.<sup>19,20</sup> Thus, R-2HG appears to exhibit complex effects and unclear functions during the initiation and progression of CCA.

Estrogen is a well-known biological sex steroid, which can elevate the progression of various types of cancers through binding to estrogen receptors (ERs), such as in breast, endometrial, and ovarian carcinomas.<sup>21–23</sup> Females are significantly more susceptible than males to suffer from several biliary tract diseases.<sup>24,25</sup> Further research also revealed that estrogen promoted CCA initiation and progression,

Received 22 September 2020; accepted 30 June 2021;  
<https://doi.org/10.1016/j.omto.2021.06.017>

**Correspondence:** Shuyuan Yeh, George Whipple Lab for Cancer Research, Departments of Urology, Pathology, and Radiation Oncology, and The Wilmot Cancer Center, University of Rochester Medical Center, Rochester, NY 14642, USA.  
**E-mail:** [shuyuan\\_yeh@urmc.rochester.edu](mailto:shuyuan_yeh@urmc.rochester.edu)

**Correspondence:** Xihu Qin, Department of Hepato-Biliary-Pancreatic Surgery, The Affiliated Changzhou No. 2 People's Hospital of Nanjing Medical University, Changzhou, Jiangsu 213003, China.

**E-mail:** [czyxh@njmu.edu.cn](mailto:czyxh@njmu.edu.cn)

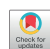

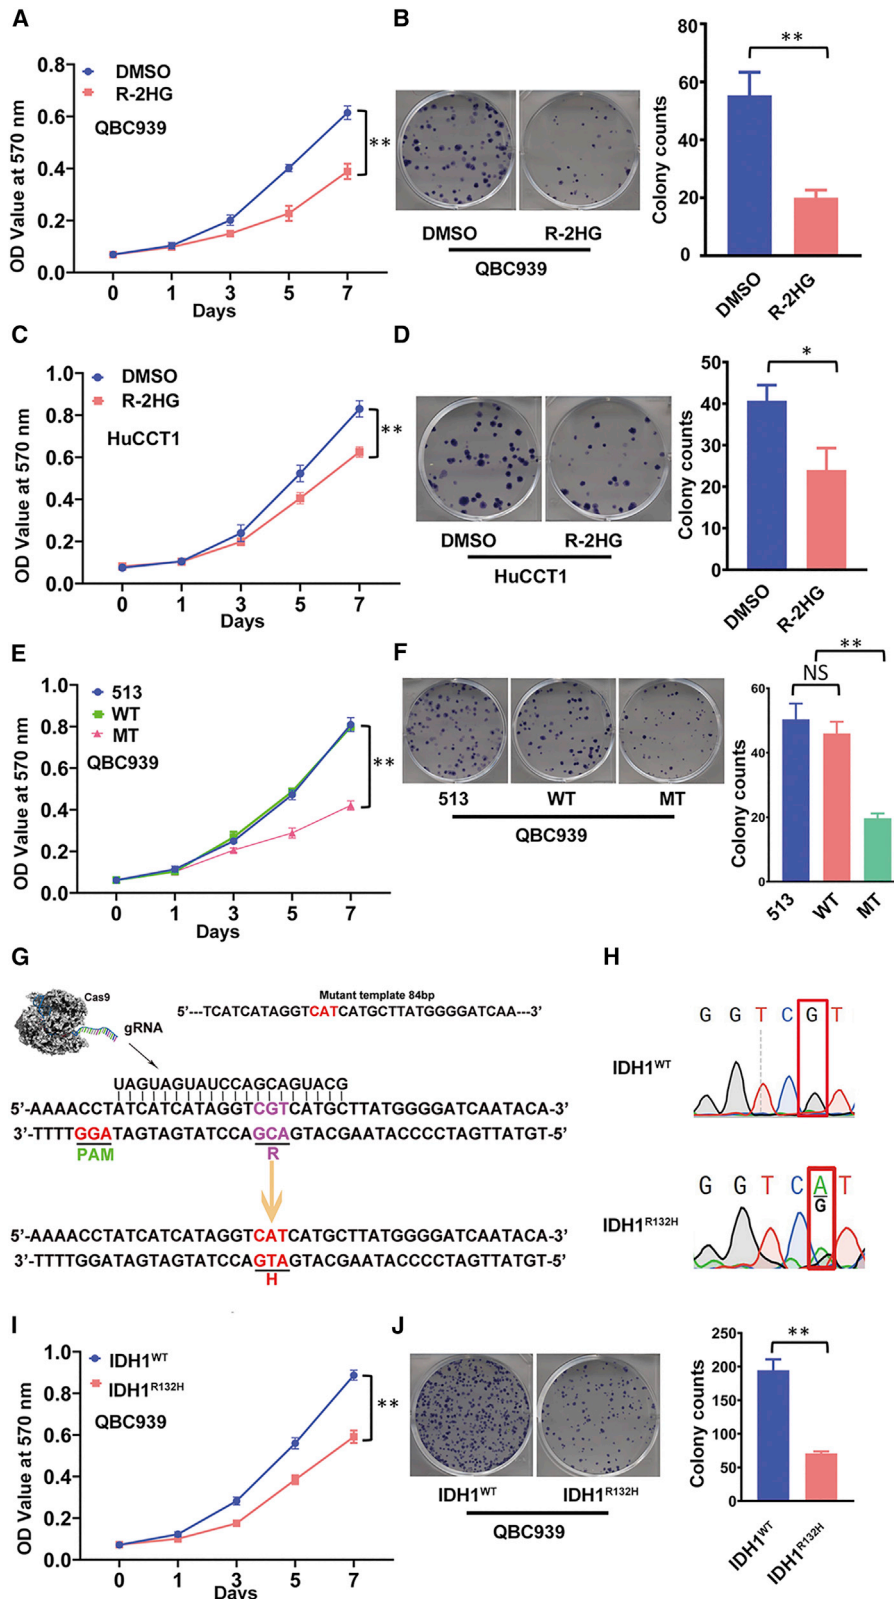

(legend on next page)

acting through ER alpha (ER $\alpha$ ).<sup>26</sup> However, the detailed mechanisms of ER $\alpha$  in CCA progression remain largely unclear. These emerging studies set a course for further exploring the functional mechanisms and signaling pathway of ER $\alpha$  in CCA.

Yes-associated protein 1 (YAP1), a co-transcriptional regulator, plays an important role in the Hippo pathway that can activate the transcription of genes involved in cell proliferation and suppress apoptotic gene expression.<sup>27,28</sup> Phosphorylation of YAP1 functionally sequesters YAP1 in the cytoplasm and limits its activity as a transcriptional co-activator. Dephosphorylated or overexpressed YAP1 can be transported into the nuclei and bound to transcription factors, subsequently enhancing transcription.<sup>29</sup> In CCA, many genes related to cell proliferation are regulated by YAP1, such as cyclin D1, Bcl-x<sub>L</sub>, and BIRC5.<sup>30,31</sup> Evaluation of YAP1 expression levels and subcellular localization in human CCA specimens revealed that most YAP1 expression was localized in the nuclei.<sup>27</sup> Clinical studies have shown that high expressions of YAP1 significantly decreased overall survival in CCA patients.<sup>32</sup> Those studies suggest that YAP1 plays a key role in the growth of the CCA tumor mass. However, the functional connections between YAP1, ER $\alpha$ , and R-2HG are an underinvestigated area.

In the present study, we focused on the biological effects of the oncometabolite R-2HG. The new findings showed that R-2HG could function as a tumor suppressor to downregulate ER $\alpha$  and YAP1 signals to inhibit CCA through the FTO/m6A/ER $\alpha$ /miR16-5p/YAP1 axis.

## RESULTS

### R-2HG suppresses cell proliferation in CCA

To study the R-2HG function in CCA cell growth, and since R-2HG can accumulate to millimolar levels in tumors,<sup>15</sup> we first exposed two CCA cell lines to 300  $\mu$ M R-2HG for 48 h. The results from the MTT (3-(4,5-dimethylthiazol-2-yl)-2,5-diphenyltetrazolium bromide) assays revealed that treating with R-2HG led to suppressing CCA cell proliferation in both CCA QBC939 and HuCCT-1 cells (Figures 1A and 1C). Similar results were also obtained when we replaced the MTT assays with colony formation assays (Figures 1B and 1D), suggesting that treatment with R-2HG can suppress CCA cell proliferation.

To further verify the results with endogenous versus exogenous R-2HG, we applied the lentivirus system to create overexpression of wild-type and mutant (MUT) IDH1<sup>R132H</sup> in CCA QBC939 cell lines. The results from MTT and colony formation assays showed similar outcomes as those for treatment with exogenous R-2HG (Figures 1E and 1F). Although the effect of overexpressing mutant IDH1

confirmed the exogenous R-2HG result, there was little change of growth rate in the IDH1 wild-type overexpressed cells. We then conducted the CRISPR-Cas9 genome-editing technique to create a heterozygous IDH1R132H mutation (IDH1<sup>R132H</sup>) in CCA QBC939 cell lines (Figure 1G). The sequencing data show the cells with wild-type (upper) versus cells with a heterozygous IDH1 point mutation (lower) (Figure 1H). We used MTT and colony formation assays to study the endogenous R-2HG function in CCA QBC939 cells. As expected, the endogenously elevated R-2HG, generated by IDH1<sup>R132H</sup>, could suppress CCA QBC939 cell proliferation and colony formation significantly (Figures 1I and 1J).

Taken together, the results from Figures 1A–1J suggest that increased R-2HG via an ectopic supply or due to the IDH1 mutation could effectively inhibit CCA cell growth.

### Mechanism dissection of how R-2HG can suppress CCA cell growth via decreasing ER $\alpha$ expression

Next, we focused on dissecting the molecular mechanism of how R-2HG can suppress CCA cell growth. Since either the IDH1 or IDH2 mutation could result in elevated R-2HG, we used the online tool GEO2R to conduct expression difference analysis of the GEO: GSE107102 microarray dataset, which contained IDH1/2 mutated human samples from the Gene Expression Omnibus (GEO, <http://www.ncbi.nlm.nih.gov/geo/>) and found 738 differential genes (Figure 2A). Then, we applied DAVID 6.8 to perform pathway enrichment analysis and obtained the top 20 enrichment pathways (Figure 2B). Subsequently, we chose the top four proliferation-related pathways as a priority for our study and eventually obtained three genes, ER $\alpha$ , HIF-1 $\alpha$ , and GJA, with consistent expression changes (Figure 2C). We then further characterized the potential clinical linkage of those genes via analyzing the human CCA samples survey from The Cancer Genome Atlas (TCGA) data (<https://www.cancer.gov/about-nci/organization/ccg/research/structural-genomics/tcga>), including 43 CCAs with six samples having IDH1/2 mutation (Table S1). Results revealed that CCA patients with better overall survival (more than 1 year) have a lower ER $\alpha$ , but they had no significant changes in HIF-1 $\alpha$  and GJA1 expressions in CCA tissues (Figure 2D). We hypothesized that ER $\alpha$  expression may be differential between CCAs with wild-type versus mutant IDH1/2. Although the numbers of IDH1/2 mutation cases are limited, the results indeed suggested higher ER $\alpha$  expressions in CCAs with wild-type IDH1/2 than with IDH1/2 mutant (Figure 2E). We then focused on studying ER $\alpha$  since early reports indicated a higher ER $\alpha$  expression in CCA patients (versus non-malignant patients) and that higher ER $\alpha$  expression promotes CCA cell growth.<sup>26,33,34</sup> We then applied the western blot assay

### Figure 1. Oncometabolite R-2HG inhibits CCA cell proliferation in QBC939 and HuCCT1 cell lines

(A and C) MTT assays were conducted to detect cell growth in QBC939 cells (A) and HuCCT1 cells (C). (B and D) Colony formation was used as another strategy to confirm the R-2HG effect on cell growth in QBC939 cells (B) and HuCCT1 cells (D). (E) R-2HG from overexpression of IDH1 mutation impacted QBC939 cell growth. (F) A colony formation assay confirmed the reduced growth of QBC939 cells with the IDH1 mutation. (G) Schematic representation of the CRISPR-Cas9 gene-editing technique in mutating the IDH1 gene. (H) Sequencing result of the IDH1 gene before (upper) and after (lower) the CRISPR-Cas9 gene editing. (I) An MTT assay was applied to detect the cell growth difference between wild-type IDH1 (IDH1<sup>WT</sup>) and IDH1<sup>R132H</sup> QBC939 cells. (J) Colony formation was conducted to confirm cell growth between IDH1<sup>WT</sup> and IDH1<sup>R132H</sup> QBC939 cells. For (B), (D), (F), and (J), quantitation is at the right and presented as mean  $\pm$  SD (n = 3). \*p < 0.05, \*\*p < 0.01; NS, not significant.

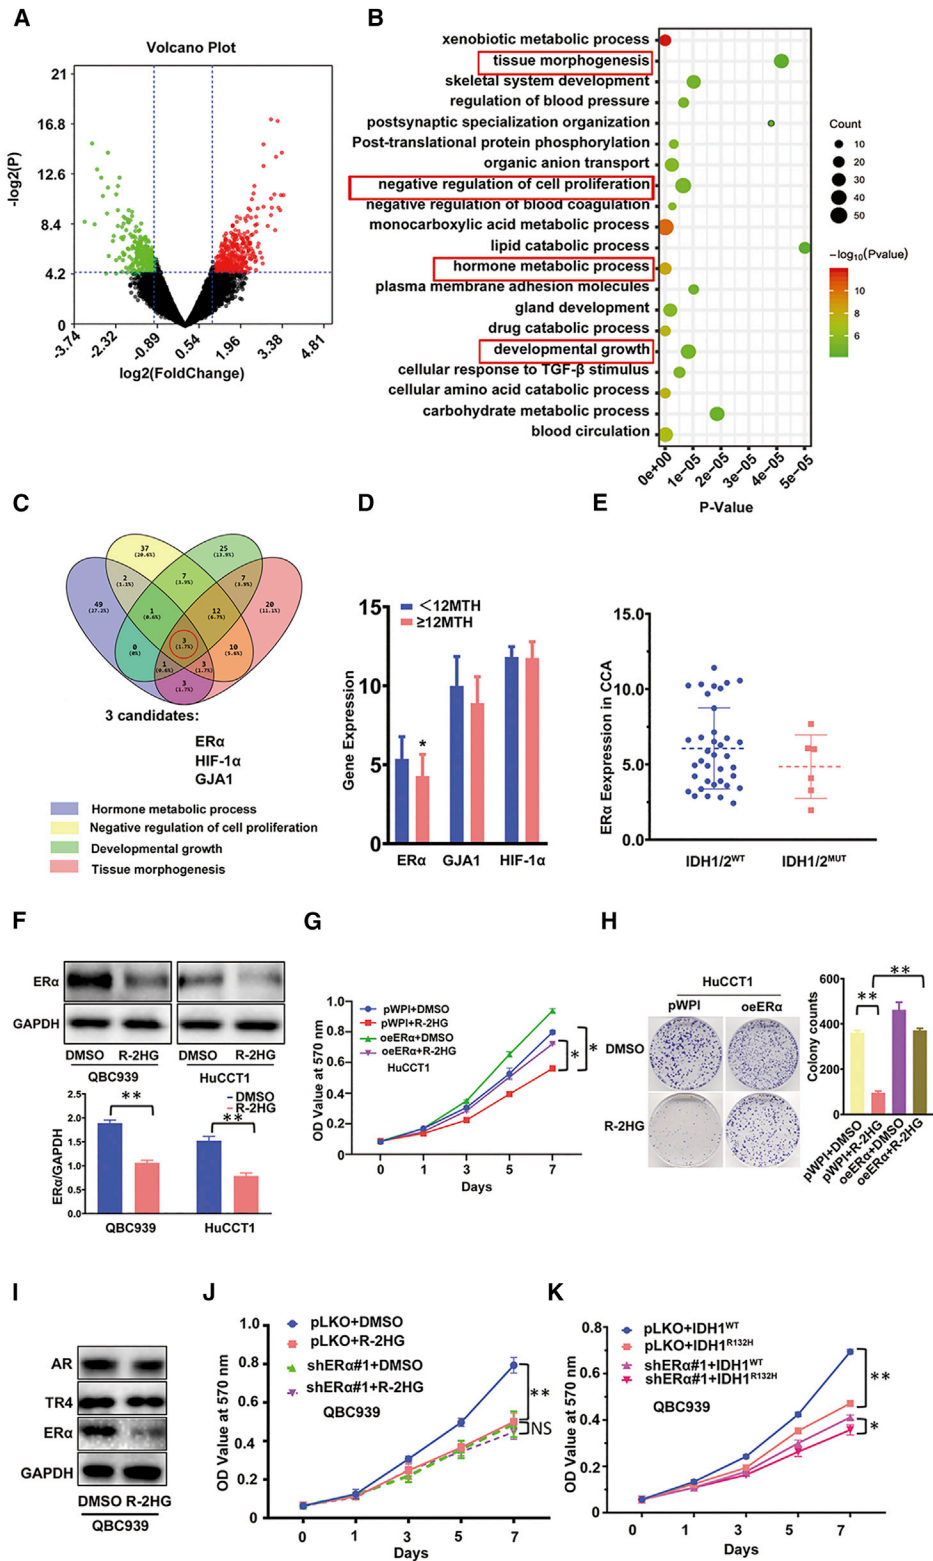

(legend on next page)

to detect the protein expression between mock (DMSO)-treated versus R-2HG-treated CCA cells and results demonstrated that treatment with R-2HG could decrease the expression of ER $\alpha$  in two CCA cell lines, QBC939 and HuCCT1 (Figure 2F).

We further applied the immunoblot to examine the ER $\alpha$  expression in CCA QBC939 and HuCCT-1 cell lines, and the results revealed lower ER $\alpha$  expression in HuCCT1 cells and higher expression in QBC939 cells (Figure S1A). We then overexpressed ER $\alpha$  with ER $\alpha$ -cDNA (oeER $\alpha$ ) in HuCCT-1 cells or knocked down ER $\alpha$  with ER $\alpha$ -short hairpin RNA (shER $\alpha$ ) in QBC939 cells via the lentiviral system. Results showed that oeER $\alpha$  in HuCCT-1 cells could significantly increase CCA cell proliferation (Figure S1B), and knocking down ER $\alpha$  in QBC939 cells could significantly decrease the CCA cell growth (Figure S1C).

Similar results were also obtained when we induced ER $\alpha$  activity with estradiol (E2) treatment. Compared to mock treatment, 10 nM E2 treatment could increase HuCCT-1 cell proliferation (Figure S1D), and treating with methyl-piperidino-pyrazole (MPP, 1  $\mu$ M), a specific ER $\alpha$  antagonist, could suppress the growth of the QBC939 cells (Figure S1E).

Importantly, results from the MTT assay using the interruption approach also revealed that overexpressing ER $\alpha$  led to the partial rescue/reverse of R-2HG-suppressed cell growth in HuCCT1 cells (Figure 2G). This interruption effect was further confirmed using a sphere formation assay (Figure 2H). To demonstrate that ER $\alpha$  is the specific R-2HG-targeting downstream gene, we first treated CCA cells with R-2HG for 48 h, and western blot data showed that among three different nuclear receptors, ER $\alpha$ , AR, and TR4, only ER $\alpha$  is selectively reduced (Figure 2I). Next, we treated ER $\alpha$  knocked-down QBC939 cells with R-2HG. As expected, after knocking down ER $\alpha$ , the sensitivity of QBC939 cells toward R-2HG treatment was diminished significantly (Figure 2J). We also knocked down ER $\alpha$  in IDH1<sup>R132H</sup> QBC939 cells. Data from MTT assays showed that ER $\alpha$  knockdown can eliminate the IDH1R132H effect (Figure 2K), which is similar to the shER $\alpha$ -QBC939 cells treated with R-2HG (Figure 2J).

Taken together, the results from Figures 2A–2K and Figures S1A–S1E suggest that R-2HG can suppress CCA cell growth via specifically decreasing ER $\alpha$  expression.

### R-2HG/ER $\alpha$ can suppress CCA cell growth via altering the downstream gene YAP1 expression

Next, to study the downstream signs of how R-2HG/ER $\alpha$  can suppress CCA cell growth, we examined those genes that are modulated in IDH1/2 mutated tumors as well as regulated by ER $\alpha$ . We tested which IDH1/2 mutant-modulated genes can also be regulated by ER $\alpha$ , and found that knocking down ER $\alpha$  led to decreased YAP1 protein expression in CCA QBC939 cells (Figure 3A). Consistently, overexpression of ER $\alpha$  led to an increase of YAP1 expression in CCA HuCCT1 cells (Figure 3B). Results from western blot assays also confirmed that R-2HG treatment could result in decreasing YAP1 expression (Figure S2A) in HuCCT1 cells, as well as in IDH1<sup>R132H</sup> QBC939 cells (Figure S2B).

To verify that YAP1 can mediate CCA cell growth, we manipulated YAP1 expression in CCA cell lines and found that overexpressing YAP1 can increase cell proliferation in CCA QBC939 cells (Figure S2C), and knocking down YAP1 (using shYAP1#1 and shYAP1#2) can both decrease cell proliferation in HuCCT1 cells (Figure S2D). Importantly, the results of MTT (Figure 3C) and sphere formation assays (Figure 3D), from an interruption approach, also revealed that overexpressing YAP1 can reverse the downregulation of ER $\alpha$ -mediated growth reduction in CCA QBC939 cells. Protein expressions of ER $\alpha$  and YAP1 for the above interruption assay were validated and are shown in Figure 3E. Consistently, using these assays, we demonstrate that knocking down YAP1 can block the ER $\alpha$  overexpression-increased cell growth in HuCCT1 cells (Figures 3F–3H). These rescue experiments were also conducted in IDH1<sup>R132H</sup> QBC939 cells, and, as expected, altering YAP1 expression can partially block the function of the endogenously IDH1<sup>R132H</sup>-increased R-2HG (Figures 3I–3K).

Taken together, the results from Figures 3A–3K and Figures S2A–S2D suggest that R-2HG treatments can lead to suppressing cell growth via altering the ER $\alpha$ /YAP1 axis in CCA cells.

### R-2HG/ER $\alpha$ can decrease YAP1 expression via altering miR16-5p expression

To dissect the mechanism of how R-2HG/ER $\alpha$  can alter YAP1 expression in CCA cells, we examined the mRNA expression of YAP1, and results from quantitative real-time PCR assay showed that downregulation of ER $\alpha$  in QBC939 cells could decrease YAP1 expression at the protein level (see Figure 3A), but not at the mRNA level (Figure 4A).

### Figure 2. ER $\alpha$ is involved in R-2HG suppression of CCA cell growth via decreasing ER $\alpha$ expression

(A) We extracted 738 differential genes from a microarray dataset (GEO: GSE107102). Red represents high overexpression, and green represents lower expression of ER $\alpha$ . (B) Top 20 enrichment pathways from the 738 differential genes. (C) ER $\alpha$ , HIF-1 $\alpha$ , and GJA1 genes were obtained through overlapping the top four pathways of size related to proliferation. (D) According to overall survival (12 months [12MTH]), TCGA data was divided into two groups; then, we checked the differential expression of three genes (ER $\alpha$ , GJA1, and HIF-1 $\alpha$ ) between the two groups. (E) ER $\alpha$  expression comparing patients with IDH1/2<sup>WT</sup> versus mutant IDH1/2 (IDH1/2<sup>MUT</sup>). (F) Western blot was conducted to examine ER $\alpha$  expression between DMSO and R-2HG treatment in QBC939 and HuCCT1 cell lines. Quantitation in the lower panel. (G and H) Cell proliferation results of HuCCT1 cells transfected with/without (w/w/o) oeER $\alpha$  (overexpressing ER $\alpha$ ) and subsequently treated with DMSO or R-2HG are shown by an MTT assay (G) and sphere formation with quantitation at the right (H). (I) Western blot was used to detect AR, ER $\alpha$ , and TR4 expression in QBC939 cells treated with R-2HG. (J) QBC939 cells transfected w/w/o shER $\alpha$  (knocked down ER $\alpha$ ) and subsequently treated with DMSO or R-2HG, after which an MTT assay was performed to examine cell growth. (K) QBC939 cells transfected w/w/o shER $\alpha$  and subsequently electro-transfected w/w/o Cas9-IDH1-Puro+template, after which an MTT assay was performed to examine cell growth. Data are presented as mean  $\pm$  SD (n = 3). \*p < 0.05, \*\*p < 0.01; NS, not significant.

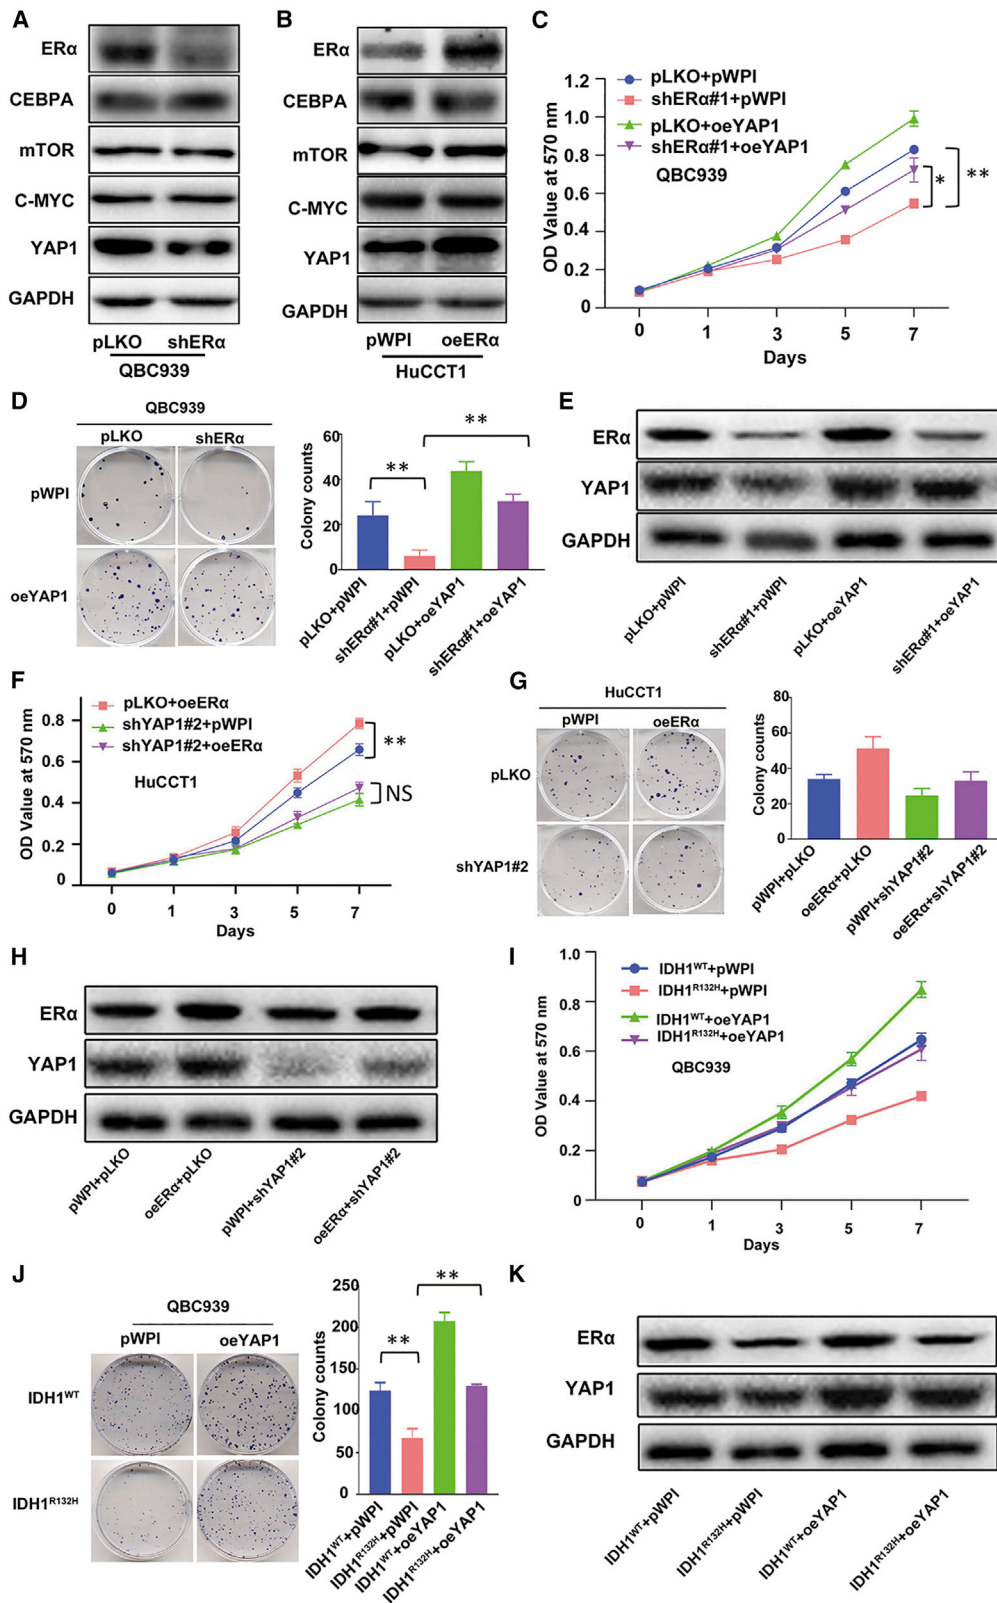

(legend on next page)

Overexpression of ER $\alpha$  in HuCCT1 cells could increase YAP1 expression at the protein level (see Figure 3B), but not at the mRNA level (Figure 4A). Additionally, these results were also observed in R-2HG-treated cell lines (Figure 4B). We then focused on the non-coding RNAs (ncRNAs), as recent studies indicated that microRNAs (miRNAs, miRs) could function as crucial regulators to bind to the 3' UTR of the targeted gene's mRNAs and affect their protein expressions to alter cancer progression.<sup>35,36</sup>

To examine whether the binding capacity of miRNAs to 3' UTR of YAP1 mRNA changes and is involved in the ER $\alpha$ -regulated YAP1 expression, we performed an Argonaute 2 (Ago2)-RNA immunoprecipitation (RIP) assay on both cell lines (Figures S3A and S3B). The results revealed that knocking down ER $\alpha$  in QBC939 cells could increase the YAP1-3' UTR level, and adding ER $\alpha$ -cDNA could decrease the YAP1-3' UTR level in the Ago2 complex (Figure 4C). Using the bioinformatics prediction databases tool (TargetScan), we found seven candidate miRNAs (miR15b-5p, miR6838-5p, miR15a-5p, miR16-5p, miR424-5p, miR195-5p, and miR497-5p) that might be able to bind to the 3' UTR of YAP1 and regulate YAP1 expression. Importantly, results from quantitative real-time PCR analysis demonstrated that miR16-5p could be regulated by ER $\alpha$ , showing that overexpressing ER $\alpha$  decreased miR16-5p expression in HuCCT-1 cells, and knocking down ER $\alpha$  increased the expression of miR16-5p in QBC939 cells (Figure 4D).

We then applied the functional assay to examine the consequence of altered miR16-5p expression. The results revealed that altering miR16-5p with inhibitor treatment (Figure S3C, left) resulted in overexpression of YAP1 protein and increasing cell proliferation in QBC939 cells (Figure S3D, left), and overexpressing miR16-5p (Figure S3C, right) resulted in the reduction of YAP1 protein and suppression of cell growth in HuCCT1 cells (Figure S3D, right). To further verify that ER $\alpha$  can function through miR16-5p to modulate YAP1 expression and cell proliferation, we conducted a reverse assay in CCA cell lines. Western blotting analysis indicated that suppressing miR16-5p could rescue YAP1 protein expression in ER $\alpha$  knocked down (shER $\alpha$ ) QBC939 cells (Figure 4E, left) and overexpressing miR16-5p also can block YAP1 protein expression in ER $\alpha$  overexpressed HuCCT1 cells (Figure 4E, right). In Figure 4F, the results of MTT (left) and sphere formation assays (middle) also show that targeting miR16-5p could rescue cell growth suppressed by knocking down ER $\alpha$  in QBC939 cells and enhancing miR16-5p level could reverse/block ER $\alpha$ -induced cell proliferation in HuCCT1 cells (Figure 4G).

In summary, the results from Figures 4A–4G and Figures S3A–S3D suggest that ER $\alpha$  may increase cell proliferation via altering miR16-5p/YAP1 signaling in CCA cells.

### R-2HG/ER $\alpha$ can regulate miR16-5p expression via transcriptional regulation

To uncover the molecular mechanism of how R-2HG/ER $\alpha$  can decrease miR16-5p expression at the transcriptional level, we first applied the Ensembl website with JASPAR database approaches to search for the potential estrogen response elements (EREs) on the 3-kb region of miR16-1 and miR16-2 promoters, which are the precursor (pre-)miRNAs of mature miR16-5p. We found only two putative EREs located within the miR16-1 promoter region (Figure 5A). We then applied the chromatin immunoprecipitation (ChIP) *in vivo* binding assay to verify their capacity of binding to ER $\alpha$ , and the results revealed that ER $\alpha$  could bind to ERE1/2 (Figure 5B).

We also constructed the miR16-1 gene promoter luciferase reporter by inserting a 3.0-kb 5' promoter region of miR16-1 containing ERE1/2 into the pGL3 luciferase backbone as well as a version with the mutated ERE1/2 (Figure 5C). The results revealed that oeER $\alpha$  significantly decreased luciferase activity in HuCCT-1 cells transfected with wild-type miR16-1 promoter, but not in the cells with the mutant miR16-1 promoter (Figure 5D, left). Knocking down ER $\alpha$  dramatically increased luciferase activity in QBC939 cells transfected with the wild-type miR16-1 promoter, but not in cells with the mutant miR16-1 promoter (Figure 5D, right).

Taken together, the results from Figures 5A–5D suggest that R-2HG/ER $\alpha$  can suppress miR16-5p expression via transcriptional regulation via binding to ERE1/2 on the miR-16-1 promoter region.

### R-2HG/ER $\alpha$ /miR16-5p axis can decrease YAP1 expression via the binding of miR16-5p to the 3' UTR of YAP1

To further dissect the molecular mechanism of how the R-2HG/ER $\alpha$ /miR16-5p axis can decrease YAP1 expression, we applied a luciferase assay to determine whether miR-16-5p might directly target the YAP1 mRNA 3' UTR to suppress its expression. We identified some potential binding sites located on the 3' UTR of YAP1 (<http://www.targetscan.org>) and then constructed the reporter plasmids with the psiCHECK-2 vector carrying the wild-type and mutant miRNA target sites (Figure 5E). As expected, the luciferase assay results revealed that overexpressing miR16-5p suppressed luciferase activity in HuCCT1 cells transfected with wild-type YAP1 3' UTR but not in the mutant YAP1 3' UTR (Figure 5F, left), and decreasing

### Figure 3. R-2HG-reduced ER $\alpha$ can suppress CCA cell growth via altering downstream gene YAP1 expression

(A and B) A western blot assay was performed to detect the four potential downstream genes that might be regulated by ER $\alpha$  in QBC939 cells w/wo ER $\alpha$  knockdown (A), and in HuCCT1 cells w/wo ER $\alpha$  overexpression (B). (C–E) QBC939 cells were transfected w/wo shER $\alpha$  and subsequently transfected w/wo oeYAP1, after which an MTT assay (C) and colony formation (D) were performed to examine cell growth. A western blot assay (E) was used to reveal ER $\alpha$  and YAP1 expressions. (F–H) HuCCT1 cells were transfected w/wo oeER $\alpha$  and subsequently transfected w/wo shYAP1, after which an MTT assay (F) and colony formation (G) were performed to examine cell proliferation, and ER $\alpha$  and YAP1 expressions were detected by a western blot assay (H). (I–K) The results of an MTT assay (I) and colony formation (J) demonstrate the efficiency of cell growth in QBC939 cells w/wo IDH1<sup>R132H</sup> and transfected w/wo oeYAP1, and ER $\alpha$  and YAP1 expressions were detected by a western blot assay (K). For (D), (G), and (J), quantitations are at the right and presented as mean  $\pm$  SD (n = 3). \*p < 0.05, \*\*p < 0.01; NS, not significant.

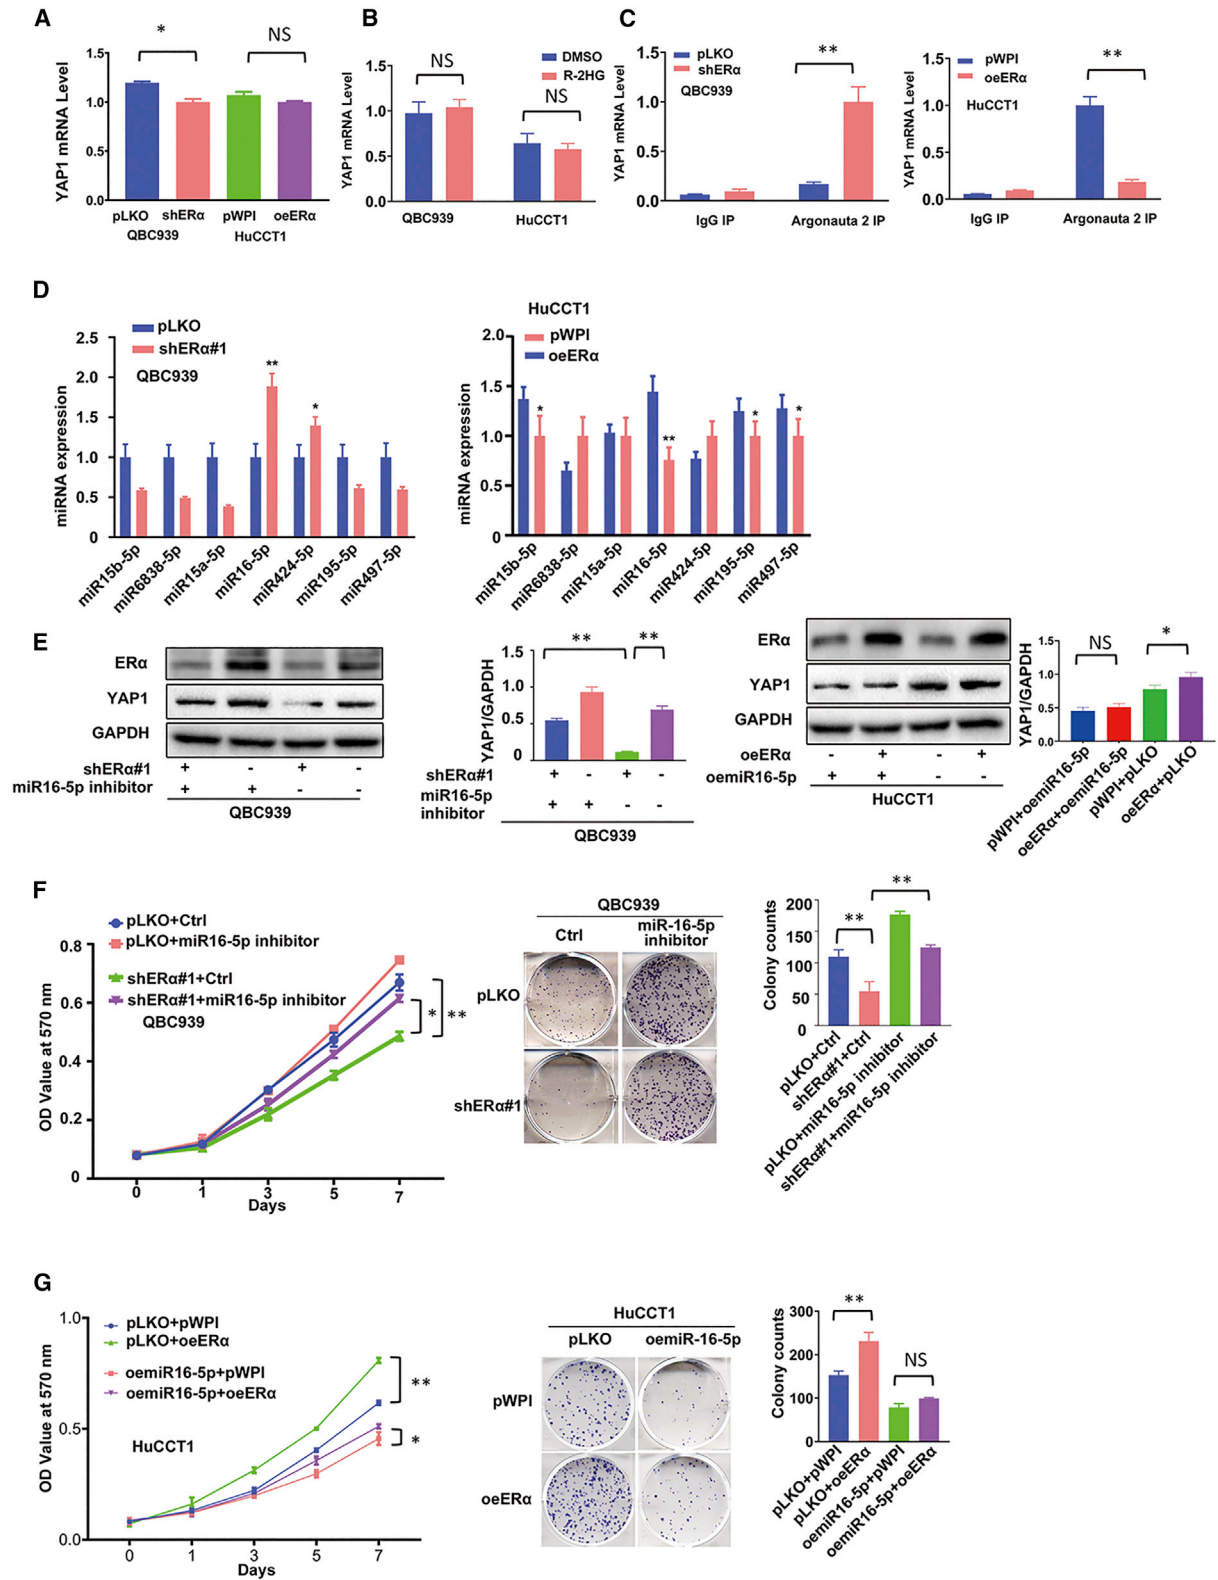

(legend on next page)



miR-16-5p, with inhibitor treatment, could increase luciferase activity in QBC939 cells transfected with the wild-type YAP1 3' UTR, but not within the mutant YAP1 3' UTR (Figure 5F, right).

Taken together, the results from Figures 5E and 5F suggest that R-2HG/ER $\alpha$ /miR16-5p axis can decrease YAP1 expression via direct targeting of the 3' UTR of YAP1-mRNA.

### R-2HG can suppress ER $\alpha$ expression via inducing high RNA-m6A methylation

To further dissect the molecular mechanism of how R-2HG can regulate ER $\alpha$  expression, we used quantitative real-time PCR to detect ER $\alpha$  mRNA expression comparing DMSO- and R-2HG-treated cells, and the results indicated that the ER $\alpha$  mRNA expression had no dramatic differences (Figure 6A). Even no significant difference was shown between CRISPR-Cas9 genome-edited wild-type IDH1 (IDH1<sup>WT</sup>) and IDH1<sup>R132H</sup> QBC939 cells (Figure 6B). There was little difference of the ER $\alpha$  mRNA stability between the DMSO- and R-2HG-treated HuCCT1 cells (data not shown). We then conducted a RIP assay using anti-Ago2 antibody and insulin-like growth factor 2 mRNA binding protein 3 antibody (anti-IGF2BP3). Many studies reported that Ago2 protein is involved in the post-transcriptional regulation through RNA-induced silencing complex (RISC), and IGF2BP3 can enhance this procedure.<sup>37–40</sup> Unexpectedly, the results opposed the hypothesis that R-2HG regulated ER $\alpha$  translation through miRNA-induced post-transcription regulation (Figure 6C). Also as expected, in the IDH1<sup>R132H</sup> QBC939 cells, the result from the RIP assay was consistent with that of R-2HG-treated HuCCT1 cells (Figure S4A). We then switched to study the ER $\alpha$  protein stability, using cycloheximide (CHX) treatment for 0, 1, 2, 4, 6, and 8 h, and the result of the western blot assay demonstrated that ER $\alpha$  protein has slightly more stability in the R-2HG treated group than that in the DMSO-treated group (Figure 6D), and a similar tendency was found in the IDH1<sup>WT</sup> QBC939 cells compared to the IDH1<sup>R132H</sup> QBC939 cells (Figure S4B). We then studied whether the ER $\alpha$  expression may be regulated at the translational level. To test this possibility, we examined the binding of 18S ribosomal RNA (rRNA), a translation marker,<sup>41</sup> to ER $\alpha$  mRNA using an ER $\alpha$  mRNA-biotin pull-down assay (Figure S4C). The quantitative real-time PCR results from the pull-down assay demonstrated that after R-2HG treatment, the 18S rRNA level decreased significantly in the ER $\alpha$  mRNA-biotin complex in QBC939 cells (Figure 6E).

To further study how R-2HG can impact ER $\alpha$  protein expression at the translational level, we focused on altering the global cell RNA-

m6A methylation to influence protein translation.<sup>15,42</sup> We first conducted a RIP assay using anti-m6A antibody (Figure S4D), and the results showed higher ER $\alpha$  mRNA expression in the m6A antibody complex in QBC939 cells treated with R-2HG (Figure 6F). This result also was reproduced in the IDH1<sup>R132H</sup> QBC939 cells (Figure S4E). We then examined the FTO expression in R-2HG-treated CCA cells, as a recent study indicated that R-2HG might induce a high m6A level via degrading FTO, which is the first mRNA demethylase studied.<sup>43,44</sup> We checked the FTO expression in the R-2HG-treated CCA cells, and the results of western blot (Figure 6G) showed that FTO expression decreased in the R-2HG-treated QBC939 (upper) and HuCCT1 (lower) cells. After manipulating FTO expression with overexpression of FTO or FTO-shRNA, MTT results revealed that cell proliferation was significantly enhanced or suppressed, respectively (Figures S4F and S4G). Furthermore, knockdown of FTO in R-2HG-sensitive QBC939 cells significantly abolished their sensitivity to R-2HG (Figure 6H), and western blot results demonstrated that after knocking down FTO in QBC939 cells, ER $\alpha$  expression showed no difference between DMSO and R-2HG treatment (Figure 6I). To further determine the mechanisms of the regulatory effects of the m6A-ER $\alpha$  mRNA, the topology of m6A RNA methylomes revealed that m6A is especially enriched around the stop codons of mRNAs with a consensus sequence of RRACH (R = G or A; H = A, C, or U).<sup>45–47</sup> The ER $\alpha$  mRNA-m6A methylated sites are located at amino acids 563–565 in the ligand-binding domain of ER $\alpha$ . To translate the same amino acids, we mutated and swapped these 3 aa codons ACG-GAC-CAA with ACU-GAU-CAG and defined this as the codon swapping mutant, ER $\alpha$ <sub>563–565</sub> CDSmt (Figure S4H). In QBC939 cells with FTO knockdown, m6A methylation of ER $\alpha$  mRNA could decrease the ER $\alpha$  protein translation in cells containing wild-type ER $\alpha$ , but not in cells with ER $\alpha$ <sub>563–565</sub> CDSmt (Figure 6J). Subsequently, the functional assay also showed that this mutant ER $\alpha$  could rescue/reverse the FTO knockdown-mediated cell growth reduction (Figure 6K).

Taken together, Figures 6A–6K and Figures S4A–S4H results suggest that R-2HG can degrade FTO and then increase ER $\alpha$  mRNA m6A methylation, which may then result in suppressing ER $\alpha$  protein expression via translational regulation.

### Increasing R-2HG or inhibition of ER $\alpha$ /YAP1 signals can suppress tumor growth in the preclinical mouse CCA model

To confirm the above *in vitro* cell line data in the *in vivo* mouse CCA model, we randomly divided mice into four groups for subcutaneous

#### Figure 4. R-2HG/ER $\alpha$ can decrease YAP1 expression via altering miR16-5P expression

(A) Real-time PCR showed YAP1 mRNA expression of shER $\alpha$  in QBC939 cells and oeER $\alpha$  in HuCCT1 cells. (B) Real-time PCR detected YAP1 expression in QBC939 and HuCCT1 cells treated w/wo R-2HG. (C) RIP assay to detect the YAP1 mRNA levels in the Argonaute 2 (Ago2) complex in QBC939 cells transfected with pLKO or shER $\alpha$  (left) and in HuCCT1 cells transfected with pWPI or oeER $\alpha$  (right). (D) Quantitative real-time PCR was used to screen seven potential miRNAs that might be able to regulate YAP1 in QBC939 cells transfected with ER $\alpha$ -shRNA or pLKO (left) and HuCCT1 cells transfected with oeER $\alpha$  or pWPI (right). (E) Western blot was used to examine YAP1 expression from the four groups of QBC939 cells as indicated (with shER $\alpha$ +miR16-5p inhibitor, pLKO+miR16-5p inhibitor, shER $\alpha$ +Ctrl, or pLKO+Ctrl) (left), and another four groups in HuCCT1 cells as indicated (oe miR16-5p+pWPI, oe miR16-5p+oeER $\alpha$ , pLKO+pWPI, pLKO+oeER $\alpha$ ) (right). (F) MTT (left) and colony formation (middle) assays were performed in QBC939 cells transfected w/wo shER $\alpha$  and w/wo miR16-5p inhibitor as indicated (left) and in four groups of HuCCT1 cells as indicated (middle). (G) MTT (left) and colony formation (middle) assays were performed in 4 groups of HuCCT1 cells as indicated. For (E, F, and G), quantitations are at the right and presented as mean  $\pm$  SD (n = 3). \*p < 0.05, \*\*p < 0.01; NS, not significant.

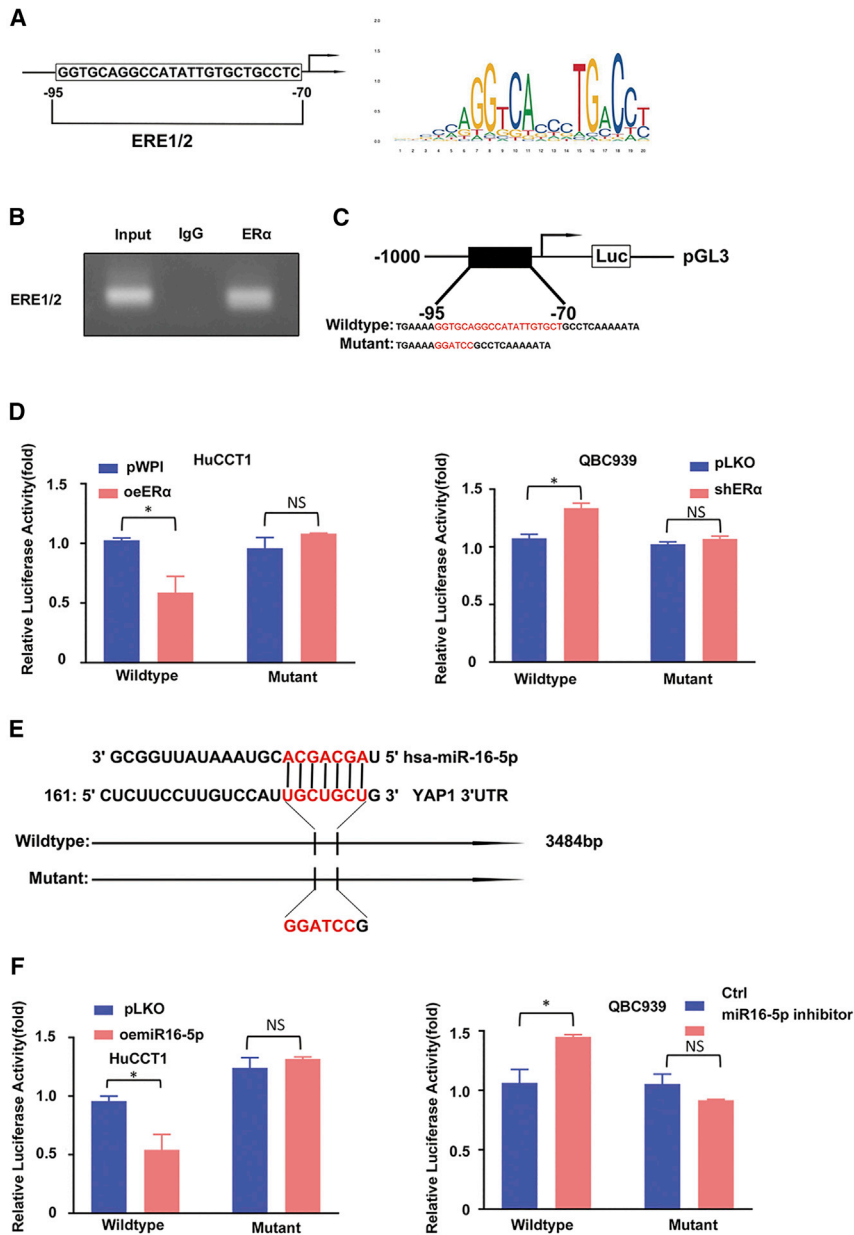

injections of QBC939 cells with IDH1<sup>WT</sup>+pLKO (group 1), IDH1<sup>WT</sup>+shERα (group 2), IDH1<sup>R132H</sup>+pLKO (group 3), and IDH1<sup>R132H</sup>+shERα (group 4). We measured the length and width of tumors to monitor tumor growth every week. After 8 weeks, mice injected with cells with the elevated R-2HG due to IDH1<sup>R132H</sup> had a suppressed tumor growth rate; however, after knocking down ERα, the effect of R-2HG-suppressed tumor growth of QBC939-IDH1<sup>R132H</sup> was abolished as compared with the QBC939-IDH1<sup>WT</sup> group (Figure 7A). We then sacrificed the mice and measured the size and weight of each tumor (Figure 7B). The results showed that the tumor weights of the IDH1<sup>WT</sup>+pLKO group were higher than those of the IDH1<sup>WT</sup> pLKO group, but no difference was detected be-

### Figure 5. ERα may transcriptionally regulate miR16-5p, and miR16-5p may directly target the 3' UTR of YAP1-mRNA to suppress its protein expression

(A) Two putative EREs predicted by JASPAR from the miR16-1 promoter. (B) ChIP assay results of ERE1/2 of the miR16-1 promoter in QBC939 cells. (C) Wild-type and mutant pGL3-miR16-1 promoter reporter constructs. (D) Luciferase activity after transfection of wild-type or mutant EREs on miR16-1 promoter reporter construct in HuCCT1 cells (left) transfected with ERα-cDNA (oeERα) or pWPI and QBC939 cells (right) transfected with ERα-shRNA (shERα) or vector pLKO. (E) Sequence alignment of the YAP1 3' UTR with wild-type versus mutant potential miR16-5p targeting sites. (F) Luciferase reporter activity after transfection of wild-type or mutant YAP1 3' UTR reporter construct in HuCCT1 cells w/wo oemiR16-5p (left) and QBC939 cells treated w/wo miR16-5p inhibitor (right). For (D) and (F), quantitations are presented as mean ± SD. \*p < 0.05; NS, not significant.

tween the IDH1<sup>WT</sup>+shERα and IDH1<sup>R132H</sup> + shERα groups (Figure 7C).

Our immunohistochemistry (IHC) staining demonstrated that YAP1 was decreased after IDH1 was mutated or ERα was knocked down (Figure 7D). Importantly, results from assaying two tumor samples from each group also revealed that endogenously elevated R-2HG, due to the R132H mutation, could decrease the ERα and YAP1 expressions, which is consistent with our *in vitro* studies showing that R-2HG can function via altering the ERα to suppress YAP1 expression (Figure 7E).

Taken together, these results of the animal experiments in Figures 7A–7E were consistent with the *in vitro* data and revealed that endogenous R-2HG suppresses CCA tumor growth; however, after knocking down ERα, the effect of suppressing tumor growth induced by R-2HG was abolished. R-2HG could suppress

CCA proliferation by modulation of ERα/miR16-5p/YAP1 signaling.

## DISCUSSION

An increase of R-2HG is the primary mechanism of mutant IDHs contributing to tumorigenesis. During tumorigenesis, R-2HG degrades TET2 and inhibits its catalytic activity, which suppresses cell differentiation and promotes malignant transformation through enhancing DNA methylation.<sup>48</sup> However, recent studies revealed that IDH1 mutation decreased tumor progression in glioma and suppressed AML cell proliferation. Mechanism dissection displayed that R-2HG functioned through m6A RNA modification regulated by

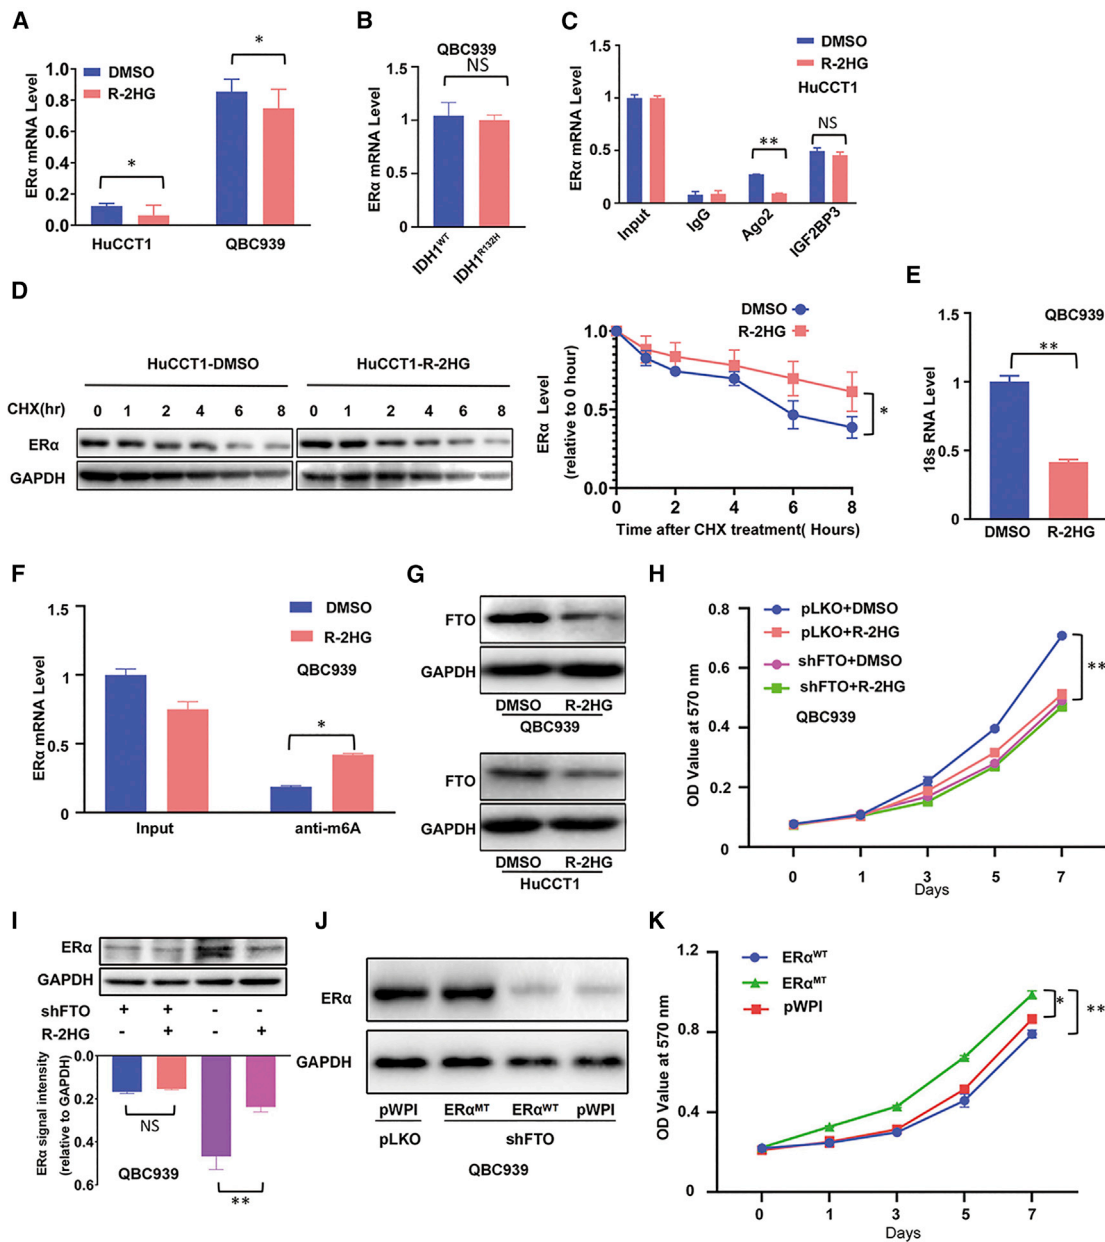

**Figure 6. R-2HG can suppress ERα expression via inducing high RNA-m6A methylation**

(A) Quantitative real-time PCR was conducted to detect ERα mRNA expression in HuCCT1 cells and QBC939 cells treated with R-2HG. (B) Quantitative real-time PCR was conducted to detect ERα mRNA expression in QBC939 cells with/without (w/w/o) IDH1<sup>R132H</sup>. (C) The ERα mRNA level was detected in the Ago2 complex and IGF2BP3 complex using a RIP assay in HuCCT1 cells treated with DMSO or R-2HG. (D) ERα protein stability test using cycloheximide (CHX) treatment in HuCCT1 cells treated w/w/o R-2HG (left) and quantitation at the right. (E) Quantitative real-time PCR showed 18S rRNA levels in the ERα mRNA-biotin pull-down complex in QBC939 cells treated w/w/o R-2HG. (F) The ERα mRNA level was detected in the anti-m6A complex using a RIP assay in QBC939 cells treated w/w/o R-2HG. (G) FTO expression in QBC939 (upper) and HuCCT1 (lower) cells after R-2HG treatment. (H) QBC939 cells transfected w/w/o shFTO and subsequently treated w/w/o R-2HG, after which an MTT assay was performed to examine cell growth. (I) The methylation of ERα mRNA could change its protein expression. A western blot was used to examine ERα expression from the four groups as indicated in QBC939 cells (upper) with quantitation in the lower panel. (J) We knocked down FTO in QBC939 cells and then divided cells into three groups and transfected them with pWPI, oeERα<sup>WT</sup>, or mutant oeERα (oeERα<sup>MT</sup>). A western blot was used to detect ERα expression. (K) MTT assay was conducted to examine cell growth among the three groups as indicated in QBC939 cells. Quantitations are presented as mean ± SD. \*p < 0.05, \*\*p < 0.01; NS, not significant.

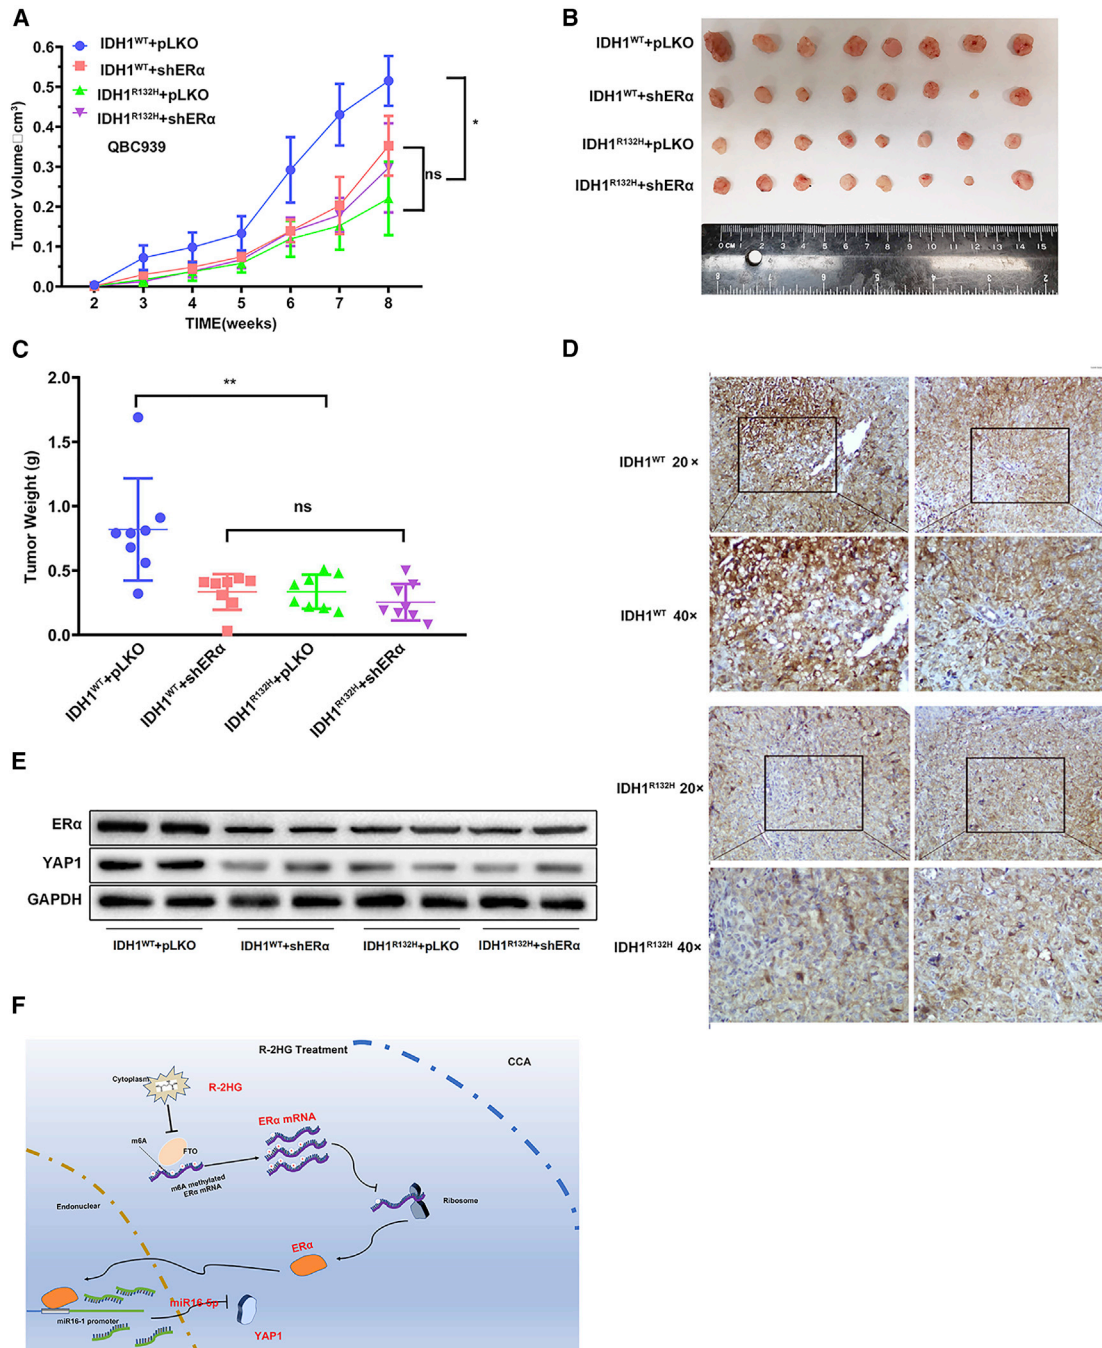

**Figure 7. *In vivo* mouse tumor model showing that the R-2HG-downregulated ER $\alpha$  signals could modulate tumor growth**

(A) The QBC939 cells transfected with IDH1<sup>WT</sup>+pLKO, IDH1<sup>WT</sup>+shER $\alpha$ , IDH1<sup>R132H</sup>+pLKO, or IDH1<sup>R132H</sup>+shER $\alpha$  were subcutaneously implanted into female nude mice, and tumor sizes were measured weekly. After 8 weeks, the mice were sacrificed and the tumor growth rates of different groups were compared. (B) Gross comparison of CCA tumor size in the four groups of mice. (C) Quantification of tumor weights. (D) Representative images of the immunohistochemistry staining of YAP1 in each group. Brown signals indicate the positive YAP1 staining. (E) Two samples from each tumor group were randomly chosen to detect YAP1 and ER $\alpha$  using a western blot. (F) Schematic model of modulating the FTO/m6A methylated ER $\alpha$ /miR16-5p/YAP1 signaling by the oncometabolite R-2HG to suppress CCA growth. Quantitations are presented as mean  $\pm$  SD. \*p < 0.05, \*\*p < 0.01; NS, not significant.

FTO.<sup>43</sup> R-2HG inhibited HNF4 $\alpha$  activity through histone methylation to interrupt hepatocyte differentiation and promote CCA genesis.<sup>13</sup> However, our study first found that R-2HG also played an anti-tumor role during CCA progression through ER $\alpha$ /miR16-5p/YAP1 signaling (Figure 7F). Our data confirmed the previously published paper, demonstrating that R-2HG functions through FTO to induce high levels of m6A modifications. High levels of m6A can recruit m6A “readers” to bind to the RNA and decide the fate of m6A-modified RNA. Among these readers, YTHDF1, YTHDF3, YTHDC1, and YTHDC2 could enhance RNA stability, and, in contrast, YTHDF2 could degrade RNA.<sup>47</sup> However, in our study, R-2HG did not dramatically decrease ER $\alpha$  mRNA levels (Figures 6A and 6B). Thus, the decreasing translation of ER $\alpha$  mRNA could not be ascribed to the m6A reader YTHDF2. Several studies reported that m6A modification could decrease translation through blocking m6A-methylated mRNAs combining with ribosomes.<sup>49,50</sup> Our data on 18S RNA detected from ER $\alpha$ -biotin pull-down demonstrated that m6A reduced the binding capacity of mRNA and ribosomes. Moreover, after mutating the potential m6A modification sites of ER $\alpha$  mRNA, this effect induced by m6A was blocked.

It is well known that ER $\alpha$  plays crucial regulatory roles facilitating the tumorigenesis process by regulation of CCA.<sup>26,34,51</sup> One published study revealed higher ER $\alpha$  expression in CCA compared with normal biliary duct tissues and found that the change of ER $\alpha$  expression can serve as a prediction marker for the prognosis of CCA patients.<sup>52</sup> Our study demonstrates that R-2HG could functionally connect between the IDH1/2 mutations and change of ER $\alpha$  expression. Then, ER $\alpha$  could regulate the YAP1 level through controlling miR16-5p expression. The miR16 family has been investigated in several human cancers and was verified to be involved in tumor suppressive and antimetastatic properties.<sup>53,54</sup> In our study, ER $\alpha$  could decrease the pre-miRNA of miR16-5p (miR16-1) expression at a transcriptional level via binding to ERE1/2 located in the 5' promoter region of its precursor, and miR16-5p could directly bind to the 3' UTR of YAP1 mRNA to suppress its protein expression. Our findings support the notion that miR16-5p could suppress CCA cell growth and R-2HG in CCA, with the IDH1/2 mutants mainly using the ER $\alpha$ /miR16-5p/YAP1 signaling pathway to regulate cell proliferation.

During tumorigenesis, YAP1 functions as a coactivator combined with transcriptionally enhanced associated domain transcription factors to promote tumor progression.<sup>55</sup> Connected to this role, it could regulate cellular proliferation, invasion, chemoresistance, and angiogenesis.<sup>28,31,56</sup> In addition, YAP1 plays vital roles in the immune system by regulating PD-L1 expression in human thoracic cancer.<sup>57</sup> Several clinical studies showed that YAP1 overexpression was correlated with poor prognosis in CCA.<sup>27,32</sup> In human astrocytes, IDH1 mutation could suppress cell proliferation through decreasing YAP1 expression; however, the mechanism of how IDH1 mutation affected YAP1 expression was unclear.<sup>58</sup> Our data uncovered that decreased YAP1 expression in IDH1 mutated cells was ascribed to R-2HG, which is the main product of the mutated IDH enzyme.

## Conclusions

This study provides novel insights into the molecular mechanisms of anti-tumor activity of R-2HG generated from IDH1/2 mutations, the cross-talk between R-2HG- and ER $\alpha$ -regulated signals, and may help in the development of novel therapeutic strategies to treat CCA with IDH mutations.

## MATERIALS AND METHODS

### Microarray data source

Gene expression profile data (GEO: GSE107102) was downloaded from Gene Expression Omnibus (<https://www.ncbi.nlm.nih.gov/geo>). Four CCA IDH1/2 mutation samples and 20 wild-type samples were included. The array data were acquired from Illumina HumanHT-12 WG-DASL v4.0 R2 (GPL14951; transcript [gene] version).

### Analysis of DEGs

GEO2R (<https://www.ncbi.nlm.nih.gov/geo/geo2r/>) was applied to compare two groups of samples in a GEO series to identify the differentially expressed genes (DEGs) under the same experimental conditions.  $|\log_2$  fold change (FC)|  $\geq$  0.5 and  $p < 0.01$  were chosen as cutoff criteria and defined a statistically significant difference. A volcano plot map of DEGs was generated using ggplot2.

### GO enrichment analysis

Gene Ontology (GO) enrichment analysis was performed by DAVID 6.8.<sup>59</sup> DAVID contains a series of functional annotation programs to explore abundant biological messages of genes, and four proliferation-related terms were chosen for overlapping. The Venn diagram was conducted using an online tool (<https://bioinfogp.cnb.csic.es/tools/venny/index.html>).

### Clinical sample description

We used the public TCGA (<https://www.cancer.gov/about-nci/organization/ccg/research/structural-genomics/tcga>) database as our primary source of samples. To analyze the data generated by TCGA, we directly downloaded all of the CCA patients' clinical information. In total, 43 tumors with clinical data were profiled for survival analysis. We also performed class discovery and class prediction analyses by comparing gene expressions.

### Cell culture and reagents

QBC939 cells were donated by Dr. Xiangcheng Li's lab,<sup>60</sup> HuCCT1 cells were obtained from the Japanese Collection of Research Bioresources Cell Bank, and HEK293T cell lines were purchased from the American Type Culture Collection. All three cell lines were maintained in Dulbecco's modified Eagle's medium (Invitrogen, Grand Island, NY, USA) with 1% penicillin and streptomycin antibiotics and 10% fetal bovine serum (FBS). All cells were incubated in a humidified 5% CO<sub>2</sub> environment at 37°C. All cells were shown to be mycoplasma negative as detected by PCR. QBC939 and HuCCT1 cells were treated with 300  $\mu$ M R-2HG (#16366, Cayman Chemical, Ann Arbor, MI, USA) for the indicated time points.

### CRISPR-Cas9-mediated IDH1 editing

The pSpCas9(BB)-2A-Puro (PX459) v2.0 was a gift from Dr. Feng Zhang<sup>61</sup> (Addgene plasmid #62988; <http://addgene.org/62988>). The guide RNA (gRNA), 5'-GCAUGACGACCUAUGATGAUAGG-3', was chosen through using an online tool developed by Dr. Zhang's lab (<https://zlab.bio/guide-design-resources>). The gRNA was cloned into a Cas9 vector using Quick Ligase (New England Biolabs, Ipswich, MA, USA). We designed the 84-bp DNA template with a single base mutation (CGT-CAT) synthesized by Integrated DNA Technologies (IDT). Plasmids and templates were electro-transfected into QBC939 cells. After 3 days, the transfected cells were then subjected to puromycin selection for 3 days and viable cells were serially diluted to generate single-cell clones. The genomic mutation was screened by Genewiz sequencing.

### Lentivirus packaging and cell transfection

The shRNA or overexpression cDNA plasmids were co-transfected with packaging plasmid psPAX2 and envelope plasmid pMD2.G into HEK293T cells following the calcium phosphate cell transfection protocol. After a 48-h incubation, the virus supernatants were harvested for immediate use and/or frozen at  $-80^{\circ}\text{C}$  for later use. The oligonucleotide sequences for the construction of the two shRNAs against ER $\alpha$  follow. The first forward primer was 5'-CCG GCT ACA GGC CAA ATT CAG ATA ATT GGA TCC GTT ATC TGA ATT TGG CCT GTA GTT TTT G-3', and the first reverse primer was 5'-AAT TCA AAA ACT ACA GGC CAA ATT CAG ATA ACG GAT CCA ATT ATC TGA ATT TGG CCT GTA G-3'. The second pair of primers were forward, 5'-CCG GGC AGG ATT GTT GTG GCT ACT ATT GGA TCC GTA GTA GCC ACA ACA ATC CTG CTT TTT G-3', and reverse, 5'-AAT TCA AAA AGC AGG ATT GTT GTG GCT ACT ACG GAT CCA ATA GTA GCC ACA ACA ATC CTG C-3'. The oligonucleotide sequences for the construction of the two shRNAs against FTO were as follows. The first pairs of primers were forward, 5'-CCG GTC ACC AAG GAG ACT GCT ATT TGG ATC CAA ATA GCA GTC TCC TTG GTG ATT TTT G-3', and reverse, 5'-AAT TCA AAA ATC ACC AAG GAG ACT GCT ATT TGG ATC CAA ATA GCA GTC TCC TTG GTG A-3'. The second pair of primers were forward, 5'-CCG GCG GTT CAC AAC CTC GGT TTA GGG ATC CCT AAA CCG AGG TTG TGA ACC GTT TTT G-3', and reverse, 5'-AAT TCA AAA ACG GTT CAC AAC CTC GGT TTA GGG ATC CCT AAA CCG AGG TTG TGA ACC G-3'. The oligonucleotide sequences for the construction of the two shRNAs against YAP1 were as follows. The first pair of primers were forward, 5'-CCG GCC CAG TTA AAT GTT CAC CAA TGG ATC CAT TGG TGA ACA TTT AAC TGG GTT TTT G-3', and reverse, 5'-AAT TCA AAA ACC CAG TTA AAT GTT CAC CAA TGG ATC CAT TGG TGA ACA TTT AAC TGG G-3'. The second pair of primers were forward, 5'-CCG GGC CAC CAA GCT AGA TAA AGA AGG ATC CTT CTT TAT CTA GCT TGG TGG CTT TTT G-3', and reverse, 5'-AAT TCA AAA AGC CAC CAA GCT AGA TAA AGA AGG ATC CTT CTT TAT CTA GCT TGG TGG C-3'. The miR-16-5p antisense inhibitor, 5'-CGC CAA UAU UUA CGU GCU GCU A-3', was ordered from IDT (Newark, NJ, USA).

### RNA extraction and quantitative real-time PCR analysis

Total RNAs were extracted using TRIzol reagent (Invitrogen, Grand Island, NY, USA). One microgram of total RNA was subjected to reverse transcription using SuperScript III transcriptase (Invitrogen). Real-time PCR was conducted using a Bio-Rad CFX96 system with SYBR Green to determine the mRNA expression level of a gene of interest. Expression levels were normalized to GAPDH level using the  $2^{-\Delta\Delta\text{Ct}}$  method.

### Western blot

Cells were washed twice with cold PBS and lysed in radioimmunoprecipitation assay (RIPA) buffer, and proteins (30–50  $\mu\text{g}$ ) were separated on 6%–10% SDS-PAGE gel and then transferred onto polyvinylidene fluoride (PVDF) membranes (Millipore, Billerica, MA, USA). After blocking with 5% BSA, the PVDF membranes were incubated with primary antibodies and then horseradish peroxidase (HRP)-conjugated secondary antibodies. Subsequently, The enhanced chemiluminescence (ECL) system (Thermo Fisher Scientific, Rochester, NY, USA) was used for visualization. The primary antibodies used for western blot were ER $\alpha$  (#ab75635, Abcam, Cambridge, MA, USA), GAPDH (#sc-166574, Santa Cruz, Paso Robles, CA, USA), YAP1 (#sc-376830, Santa Cruz, Paso Robles, CA, USA), FTO (#ab124892, Abcam, Cambridge, MA, USA), Ago2 (#2897, Cell Signaling Technology, Boston, MA, USA), and immunoglobulin (Ig)G (#sc-2027, Santa Cruz, Paso Robles, CA, USA).

### RIP

QBC939 and HuCCT1 cells after different treatments were fixed by 4% paraformaldehyde and were lysed in ice-cold lysis buffer supplemented with RNase inhibitor. After centrifugation, 1 mL of the supernatants was pre-cleared by protein A/G beads for 1 h. After that, samples were incubated with Ago2, IGF2BP3, or m6A antibody overnight at  $4^{\circ}\text{C}$ . The RNA/antibody complexes were washed four times by RIPA buffer supplemented with RNase inhibitor and protease inhibitor cocktail. The RNA was extracted using TRIzol (Invitrogen) according to the manufacturer's protocol and subjected to quantitative real-time PCR analysis.

### ER $\alpha$ mRNA-18S rRNA pull-down assay

The cells were collected in cell lysis buffer after receiving the designated treatments for 48 h. The cell lysate mixture was rotated overnight at  $4^{\circ}\text{C}$  after adding 1.5  $\mu\text{L}$  of RNase inhibitor and 500 pM biotin-labeled anti-sense oligonucleotides against ER $\alpha$  mRNA (5'-TTC CCT GGT TCC TGT CCA AGA GCA-3'). The lysate mixture was rotated for 1 h at  $4^{\circ}\text{C}$  after adding 10  $\mu\text{L}$  of streptavidin agarose beads. The mixture was centrifuged at 3,000 rpm for 2 min, and then the beads were washed with cell lysis buffer five times. Total RNAs were extracted by TRIzol (Invitrogen) according to the manufacturer's protocol and reverse transcribed. Quantitative real-time PCR was used to test the levels of ER $\alpha$  to ensure that each group was loaded equally for the following step. 18S rRNA was detected using quantitative real-time PCR analysis from the complex.

### ChIP assay

The cross-linked protein-DNA complexes were fixed by 1% formaldehyde and quenched using 125 mM glycine. Cells were harvested in lysis buffer and subjected to sonication. Normal IgG and protein A-agarose were used sequentially to pre-clear the cell lysates. We then added 2.0  $\mu$ g of anti-ER $\alpha$  antibody to the cell lysates and incubated them overnight at 4°C. IgG was used in the reaction for a negative control. Specific primer sets were designed to amplify a target sequence within the miR-16-1 promoter, and agarose gel electrophoresis was used to identify the PCR products.

### Luciferase reporter assay

A 3-kb length of the miR-16-1 promoter with wild-type or mutant ER $\alpha$ -responsive elements was cloned into the pGL3-basic luciferase reporter vector (Promega, Madison, WI, USA). Then, 500-bp-fragment nucleotides of the YAP1 3' UTR with wild-type or mutant miRNA-binding sites were cloned into the psiCHECK-2 vector (Promega) downstream of the Renilla luciferase open reading frame (ORF). HuCCT1 and QBC939 cells were plated in 24-well plates and the plasmids were transfected with Lipofectamine 3000 transfection reagent (Invitrogen, Carlsbad, CA, USA) according to the manufacturer's instructions. Luciferase activity was measured 36 h after transfection by a Dual-Luciferase assay (Promega) according to the manufacturer's manual.

### Preclinical mouse tumor study

Thirty-two 6-week-old female nude mice were purchased from the National Cancer Institute (NCI) and divided into four groups for injection of QBC939 cells transfected/engineered with (1) IDH1<sup>WT</sup>+pLKO, (2) IDH1<sup>WT</sup>+shER $\alpha$ , (3) IDH1<sup>R132H</sup>+pLKO, and (4) IDH1<sup>R132H</sup>+shER $\alpha$ . The prepared stable QBC939 cells (mixed with Matrigel, 1:1) were subcutaneously injected at  $1 \times 10^6$  into the mouse flanks. The growth rates of CCA tumors were monitored by measuring the length and width of the tumors once a week. The mice were sacrificed after 8 weeks. Tumors were removed for studies. Animal experiments were approved by institutional animal care at the University of Rochester Medical Center.

### IHC

IHC was performed on the xenografted tumors. Formalin-fixed and paraffin-embedded tissue slides (5  $\mu$ m) were deparaffinized and rehydrated. Antigen retrieval was performed by incubating the tissue slides in 0.01 M citric acid buffer at 100°C for 10 min. After blocking with 3% H<sub>2</sub>O<sub>2</sub> and 5% FBS, the slides were incubated with a monoclonal antibody against YAP1 (1:100, #sc-376830, Santa Cruz, Paso Robles, CA, USA) at 4°C overnight. The slides were then reacted with polymer HRP reagent. The peroxidase activity was visualized with diaminobenzidine tetrahydrochloride solution. The sections were counterstained with hematoxylin. Dark brown cytoplasmic staining of at least 1% of tumor cells was defined as positive, and no staining or less than 1% of cells stained was defined as negative.

### Statistical analysis

Statistical analysis was performed using SPSS software (version 23.0; SPSS, Chicago, IL, USA) or GraphPad Prism 6 (GraphPad, La Jolla,

CA, USA). The Mann-Whitney U test was applied to compare the two independent groups when the dependent variable was continuous. A Kruskal-Wallis test with a Dunn-Bonferroni post hoc test was applied to test the multiple group's continuous data. All experiments were conducted with three technical replicates and performed at least three times. The data values were presented as the mean  $\pm$  SD. Differences in mean values between two groups were analyzed by a two-tailed Student's t test, and the mean values of more than two groups were compared with one-way ANOVA.  $p < 0.05$  was considered to indicate a statistically significant difference.

### SUPPLEMENTAL INFORMATION

Supplemental information can be found online at <https://doi.org/10.1016/j.omto.2021.06.017>.

### ACKNOWLEDGMENTS

This work was partially supported by the University of Rochester George Whipple Endowment, the National Natural Science Foundation of China (no. 81672469), and the endowment from the Division of General Surgery of Changzhou No. 2 People's Hospital. We thank Karen Wolf for editing the manuscript.

### AUTHOR CONTRIBUTIONS

S.Y., X.Q., and Y.G. designed and conceived the experiments. Y.G., X.O., and Y.S. performed the experiments. Y.G., S.Y., X.O., L.Z., Y.X., X.Q., and C.C. contributed to the acquisition, analysis, and interpretation of data. Y.G., S.Y., Y.S., and C.C. wrote the paper. All authors read and approved the manuscript.

### DECLARATION OF INTERESTS

The authors declare no competing interests.

### REFERENCES

- Razumilava, N., and Gores, G.J. (2014). Cholangiocarcinoma. *Lancet* 383, 2168–2179.
- Khan, S.A., Thomas, H.C., Davidson, B.R., and Taylor-Robinson, S.D. (2005). Cholangiocarcinoma. *Lancet* 366, 1303–1314.
- Watanapa, P. (1996). Cholangiocarcinoma in patients with opisthorchiasis. *Br. J. Surg.* 83, 1062–1064.
- Dreyer, C., Le Tourneau, C., Faivre, S., Qian, Z., Degos, F., Vuilleme, M.P., Paradis, V., Hammel, P., Ruszniewski, P., Cortes, A., et al. (2008). [Cholangiocarcinoma: epidemiology and global management]. *Rev. Med. Interne* 29, 642–651.
- El-Diwany, R., Pawlik, T.M., and Ejaz, A. (2019). Intrahepatic cholangiocarcinoma. *Surg. Oncol. Clin. N. Am.* 28, 587–599.
- Rizvi, S., and Gores, G.J. (2013). Pathogenesis, diagnosis, and management of cholangiocarcinoma. *Gastroenterology* 145, 1215–1229.
- Bertuccio, P., Malvezzi, M., Carioli, G., Hashim, D., Boffetta, P., El-Serag, H.B., La Vecchia, C., and Negri, E. (2019). Global trends in mortality from intrahepatic and extrahepatic cholangiocarcinoma. *J. Hepatol.* 71, 104–114.
- Khan, S.A., Tavolari, S., and Brandi, G. (2019). Cholangiocarcinoma: Epidemiology and risk factors. *Liver Int.* 39 (Suppl 1), 19–31.
- Vogelstein, B., Papadopoulos, N., Velculescu, V.E., Zhou, S., Diaz, L.A., Jr., and Kinzler, K.W. (2013). Cancer genome landscapes. *Science* 339, 1546–1558.
- Zabron, A., Edwards, R.J., and Khan, S.A. (2013). The challenge of cholangiocarcinoma: Dissecting the molecular mechanisms of an insidious cancer. *Dis. Model. Mech.* 6, 281–292.

11. Dang, L., and Su, S.M. (2017). Isocitrate dehydrogenase mutation and (R)-2-hydroxyglutarate: From basic discovery to therapeutics development. *Annu. Rev. Biochem.* 86, 305–331.
12. Peraldo-Neia, C., Ostano, P., Cavalloni, G., Pignochino, Y., Sangiolo, D., De Cecco, L., Marchesi, E., Ribero, D., Scarpa, A., De Rose, A.M., et al. (2018). Transcriptomic analysis and mutational status of *IDH1* in paired primary-recurrent intrahepatic cholangiocarcinoma. *BMC Genomics* 19, 440.
13. Saha, S.K., Parachoniak, C.A., Ghanta, K.S., Fitamant, J., Ross, K.N., Najem, M.S., Gurumurthy, S., Akbay, E.A., Sia, D., Cornella, H., et al. (2014). Mutant *IDH* inhibits *HNF-4 $\alpha$*  to block hepatocyte differentiation and promote biliary cancer. *Nature* 513, 110–114.
14. Saha, S.K., Parachoniak, C.A., and Bardeesy, N. (2014). *IDH* mutations in liver cell plasticity and biliary cancer. *Cell Cycle* 13, 3176–3182.
15. Losman, J.A., and Kaelin, W.G., Jr. (2013). What a difference a hydroxyl makes: Mutant *IDH*, (R)-2-hydroxyglutarate, and cancer. *Genes Dev.* 27, 836–852.
16. Dang, L., White, D.W., Gross, S., Bennett, B.D., Bittinger, M.A., Driggers, E.M., Fantin, V.R., Jang, H.G., Jin, S., Keenan, M.C., et al. (2009). Cancer-associated *IDH1* mutations produce 2-hydroxyglutarate. *Nature* 462, 739–744.
17. Figueroa, M.E., Abdel-Wahab, O., Lu, C., Ward, P.S., Patel, J., Shih, A., Li, Y., Bhagwat, N., Vasanthakumar, A., Fernandez, H.F., et al. (2010). Leukemic *IDH1* and *IDH2* mutations result in a hypermethylation phenotype, disrupt *TET2* function, and impair hematopoietic differentiation. *Cancer Cell* 18, 553–567.
18. Xu, W., Yang, H., Liu, Y., Yang, Y., Wang, P., Kim, S.H., Ito, S., Yang, C., Wang, P., Xiao, M.T., et al. (2011). Oncometabolite 2-hydroxyglutarate is a competitive inhibitor of  $\alpha$ -ketoglutarate-dependent dioxygenases. *Cancer Cell* 19, 17–30.
19. Kipp, B.R., Voss, J.S., Kerr, S.E., Barr Fritcher, E.G., Graham, R.P., Zhang, L., Highsmith, W.E., Zhang, J., Roberts, L.R., Gores, G.J., and Halling, K.C. (2012). Isocitrate dehydrogenase 1 and 2 mutations in cholangiocarcinoma. *Hum. Pathol.* 43, 1552–1558.
20. Wang, P., Dong, Q., Zhang, C., Kuan, P.F., Liu, Y., Jeck, W.R., Andersen, J.B., Jiang, W., Savich, G.L., Tan, T.X., et al. (2013). Mutations in isocitrate dehydrogenase 1 and 2 occur frequently in intrahepatic cholangiocarcinomas and share hypermethylation targets with glioblastomas. *Oncogene* 32, 3091–3100.
21. Yager, J.D., and Davidson, N.E. (2006). Estrogen carcinogenesis in breast cancer. *N. Engl. J. Med.* 354, 270–282.
22. Richardson, G.S. (1972). Endometrial cancer as an estrogen-progesterone target. *N. Engl. J. Med.* 286, 645–647.
23. Brown, S.B., and Hankinson, S.E. (2015). Endogenous estrogens and the risk of breast, endometrial, and ovarian cancers. *Steroids* 99 (Pt A), 8–10.
24. Alvaro, D., Mancino, M.G., Onori, P., Franchitto, A., Alpini, G., Francis, H., Glaser, S., and Gaudio, E. (2006). Estrogens and the pathophysiology of the biliary tree. *World J. Gastroenterol.* 12, 3537–3545.
25. Gershwin, M.E., Selmi, C., Worman, H.J., Gold, E.B., Watnik, M., Utts, J., Lindor, K.D., Kaplan, M.M., and Vierling, J.M.; USA PBC Epidemiology Group (2005). Risk factors and comorbidities in primary biliary cirrhosis: A controlled interview-based study of 1032 patients. *Hepatology* 42, 1194–1202.
26. Isse, K., Specht, S.M., Lunz, J.G., 3rd, Kang, L.I., Mizuguchi, Y., and Demetris, A.J. (2010). Estrogen stimulates female biliary epithelial cell interleukin-6 expression in mice and humans. *Hepatology* 51, 869–880.
27. Wu, H., Liu, Y., Jiang, X.W., Li, W.F., Guo, G., Gong, J.P., and Ding, X. (2016). Clinicopathological and prognostic significance of Yes-associated protein expression in hepatocellular carcinoma and hepatic cholangiocarcinoma. *Tumour Biol.* 37, 13499–13508.
28. Zhao, B., Li, L., Lei, Q., and Guan, K.L. (2010). The Hippo-YAP pathway in organ size control and tumorigenesis: an updated version. *Genes Dev.* 24, 862–874.
29. Sugihara, T., Werneburg, N.W., Hernandez, M.C., Yang, L., Kabashima, A., Hirssova, P., Yohanathan, L., Sosa, C., Truty, M.J., Vasmataz, G., et al. (2018). YAP tyrosine phosphorylation and nuclear localization in cholangiocarcinoma cells are regulated by LCK and independent of LATS activity. *Mol. Cancer Res.* 16, 1556–1567.
30. Rosenbluh, J., Nijhawan, D., Cox, A.G., Li, X., Neal, J.T., Schafer, E.J., Zack, T.I., Wang, X., Tsherniak, A., Schinzel, A.C., et al. (2012).  $\beta$ -Catenin-driven cancers require a YAP1 transcriptional complex for survival and tumorigenesis. *Cell* 151, 1457–1473.
31. Cao, X., Pfaff, S.L., and Gage, F.H. (2008). YAP regulates neural progenitor cell number via the TEA domain transcription factor. *Genes Dev.* 22, 3320–3334.
32. Sugimachi, K., Nishio, M., Aishima, S., Kuroda, Y., Iguchi, T., Komatsu, H., Hirata, H., Sakimura, S., Eguchi, H., Bekki, Y., et al. (2017). Altered expression of Hippo signaling pathway molecules in intrahepatic cholangiocarcinoma. *Oncology* 93, 67–74.
33. Mancino, A., Mancino, M.G., Glaser, S.S., Alpini, G., Bolognese, A., Izzo, L., Francis, H., Onori, P., Franchitto, A., Ginanni-Corradini, S., et al. (2009). Estrogens stimulate the proliferation of human cholangiocarcinoma by inducing the expression and secretion of vascular endothelial growth factor. *Dig. Liver Dis.* 41, 156–163.
34. Hunsawong, T., Singsuksawat, E., In-chon, N., Chawengrattanachot, W., Thuwajit, C., Sripa, B., Paupairoj, A., Chau-in, S., and Thuwajit, P. (2012). Estrogen is increased in male cholangiocarcinoma patients' serum and stimulates invasion in cholangiocarcinoma cell lines in vitro. *J. Cancer Res. Clin. Oncol.* 138, 1311–1320.
35. Iorio, M.V., and Croce, C.M. (2012). MicroRNA involvement in human cancer. *Carcinogenesis* 33, 1126–1133.
36. Lin, S., and Gregory, R.I. (2015). MicroRNA biogenesis pathways in cancer. *Nat. Rev. Cancer* 15, 321–333.
37. Ennajdaoui, H., Howard, J.M., Sterne-Weiler, T., Jahanbani, F., Coyne, D.J., Uren, P.J., Dargyte, M., Katzman, S., Draper, J.M., Wallace, A., et al. (2016). IGF2BP3 modulates the interaction of invasion-associated transcripts with RISC. *Cell Rep.* 15, 1876–1883.
38. Hutvagner, G., and Simard, M.J. (2008). Argonaute proteins: Key players in RNA silencing. *Nat. Rev. Mol. Cell Biol.* 9, 22–32.
39. Filipowicz, W., Jaskiewicz, L., Kolb, F.A., and Pillai, R.S. (2005). Post-transcriptional gene silencing by siRNAs and miRNAs. *Curr. Opin. Struct. Biol.* 15, 331–341.
40. Miyoshi, K., Tsukumo, H., Nagami, T., Siomi, H., and Siomi, M.C. (2005). Slicer function of *Drosophila* Argonautes and its involvement in RISC formation. *Genes Dev.* 19, 2837–2848.
41. Both, G.W., Moyer, S.A., and Banerjee, A.K. (1975). Translation and identification of the mRNA species synthesized in vitro by the virion-associated RNA polymerase of vesicular stomatitis virus. *Proc. Natl. Acad. Sci. USA* 72, 274–278.
42. Zhao, B.S., Roundtree, I.A., and He, C. (2017). Post-transcriptional gene regulation by mRNA modifications. *Nat. Rev. Mol. Cell Biol.* 18, 31–42.
43. Su, R., Dong, L., Li, C., Nachtergaele, S., Wunderlich, M., Qing, Y., Deng, X., Wang, Y., Weng, X., and Hu, C. (2018). R-2HG exhibits anti-tumor activity by targeting FTO/m<sup>6</sup>A/MYC/CEBPA signaling. *Cell* 172, 90–105.e23.
44. Zhao, X., Yang, Y., Sun, B.F., Shi, Y., Yang, X., Xiao, W., Hao, Y.J., Ping, X.L., Chen, Y.S., Wang, W.J., et al. (2014). FTO-dependent demethylation of N<sup>6</sup>-methyladenosine regulates mRNA splicing and is required for adipogenesis. *Cell Res.* 24, 1403–1419.
45. Dominissini, D., Moshitch-Moshkovitz, S., Schwartz, S., Salmon-Divon, M., Ungar, L., Osenberg, S., Cesarkas, K., Jacob-Hirsch, J., Amariglio, N., Kupiec, M., et al. (2012). Topology of the human and mouse m<sup>6</sup>A RNA methylomes revealed by m<sup>6</sup>A-seq. *Nature* 485, 201–206.
46. Meyer, K.D., Saletore, Y., Zumbo, P., Elemento, O., Mason, C.E., and Jaffrey, S.R. (2012). Comprehensive analysis of mRNA methylation reveals enrichment in 3' UTRs and near stop codons. *Cell* 149, 1635–1646.
47. Wang, X., Lu, Z., Gomez, A., Hon, G.C., Yue, Y., Han, D., Fu, Y., Parisien, M., Dai, Q., Jia, G., et al. (2014). N<sup>6</sup>-methyladenosine-dependent regulation of messenger RNA stability. *Nature* 505, 117–120.
48. Losman, J.A., Looper, R.E., Koivunen, P., Lee, S., Schneider, R.K., McMahon, C., Cowley, G.S., Root, D.E., Ebert, B.L., and Kaelin, W.G., Jr. (2013). (R)-2-hydroxyglutarate is sufficient to promote leukemogenesis and its effects are reversible. *Science* 339, 1621–1625.
49. Qi, S.T., Ma, J.Y., Wang, Z.B., Guo, L., Hou, Y., and Sun, Q.Y. (2016). N<sup>6</sup>-methyladenosine sequencing highlights the involvement of mRNA methylation in oocyte meiotic maturation and embryo development by regulating translation in *Xenopus laevis*. *J. Biol. Chem.* 291, 23020–23026.



50. Slobodin, B., Han, R., Calderone, V., Vrielink, J.A.F.O., Loayza-Puch, F., Elkon, R., and Agami, R. (2017). Transcription impacts the efficiency of mRNA translation via co-transcriptional N6-adenosine methylation. *Cell* 169, 326–337.e12.
51. Sritana, N., Suriyo, T., Kanitwithayanun, J., Songvasin, B.H., Thiantanawat, A., and Satayavivad, J. (2018). Glyphosate induces growth of estrogen receptor alpha positive cholangiocarcinoma cells via non-genomic estrogen receptor/ERK1/2 signaling pathway. *Food Chem. Toxicol.* 118, 595–607.
52. Alvaro, D., Barbaro, B., Franchitto, A., Onori, P., Glaser, S.S., Alpini, G., Francis, H., Marucci, L., Sterpetti, P., Ginanni-Corradini, S., et al. (2006). Estrogens and insulin-like growth factor 1 modulate neoplastic cell growth in human cholangiocarcinoma. *Am. J. Pathol.* 169, 877–888.
53. Maximov, V.V., Akkawi, R., Khawaled, S., Salah, Z., Jaber, L., Barhoum, A., Or, O., Galasso, M., Kurek, K.C., Yavin, E., and Aqeilan, R.I. (2019). miR-16-1-3p and miR-16-2-3p possess strong tumor suppressive and antimetastatic properties in osteosarcoma. *Int. J. Cancer* 145, 3052–3063.
54. Liu, G.P., Wang, W.W., Lu, W.Y., and Shang, A.Q. (2019). The mechanism of miR-16-5p protection on LPS-induced A549 cell injury by targeting CXCR3. *Artif. Cells Nanomed. Biotechnol.* 47, 1200–1206.
55. Marti, P., Stein, C., Blumer, T., Abraham, Y., Dill, M.T., Pikiolek, M., Orsini, V., Jurisic, G., Megel, P., Makowska, Z., et al. (2015). YAP promotes proliferation, chemoresistance, and angiogenesis in human cholangiocarcinoma through TEAD transcription factors. *Hepatology* 62, 1497–1510.
56. Sugihara, T., Isomoto, H., Gores, G., and Smoot, R. (2019). YAP and the Hippo pathway in cholangiocarcinoma. *J. Gastroenterol.* 54, 485–491.
57. Hsu, P.C., Jablons, D.M., Yang, C.T., and You, L. (2019). Epidermal growth factor receptor (EGFR) pathway, Yes-associated protein (YAP) and the regulation of programmed death-ligand 1 (PD-L1) in non-small cell lung cancer (NSCLC). *Int. J. Mol. Sci.* 20, 3821.
58. Wei, S., Wang, J., Oyinlade, O., Ma, D., Wang, S., Kratz, L., Lal, B., Xu, Q., Liu, S., Shah, S.R., et al. (2018). Heterozygous *IDH1*<sup>R132H/WT</sup> created by “single base editing” inhibits human astroglial cell growth by downregulating YAP. *Oncogene* 37, 5160–5174.
59. Huang, W., Sherman, B.T., and Lempicki, R.A. (2009). Systematic and integrative analysis of large gene lists using DAVID bioinformatics resources. *Nat. Protoc.* 4, 44–57.
60. Wang, Y., Jiang, W., Li, C., Xiong, X., Guo, H., Tian, Q., and Li, X. (2020). Autophagy suppression accelerates apoptosis induced by norcantharidin in cholangiocarcinoma. *Pathol. Oncol. Res.* 26, 1697–1707.
61. Ran, F.A., Hsu, P.D., Wright, J., Agarwala, V., Scott, D.A., and Zhang, F. (2013). Genome engineering using the CRISPR-Cas9 system. *Nat. Protoc.* 8, 2281–2308.

OMTO, Volume 23

## Supplemental information

**R-2HG downregulates ER $\alpha$  to inhibit  
cholangiocarcinoma via the FTO/m6A-methylated  
ER $\alpha$ /miR16-5p/YAP1 signal pathway**

**Yuan Gao, Xiwu Ouyang, Li Zuo, Yao Xiao, Yin Sun, Chawnshang Chang, Xihu Qin, and Shuyuan Yeh**

**Supplementary Fig. S1.** (A) ER $\alpha$  expression in QBC939 and HuCCT1 cell lines. (B) MTT assay analyzed cell growth after over-expressing ER $\alpha$  in HuCCT1 cells. (C) MTT assay analyzed cell growth after knocking down ER $\alpha$  with shER $\alpha$ #1 or shER $\alpha$ #2 in QBC939 cells. (D-E) MTT assay of estrogen promoted cell proliferation in HuCCT1 (D), and estrogen antagonist (MPP) inhibited cell growth in QBC939 cells (E). Quantitations are presented as mean  $\pm$  SD. \*  $P < 0.05$ .

**Supplementary Fig. S2.** (A) YAP1 expression in HuCCT1 cells treated with DMSO or R-2HG. (B) YAP1 expression in QBC939 cells carrying IDH1 wild-type (WT) or mutant (MT). (C) After over-expressing (oe) YAP1 in QBC939 cells, MTT assay was conducted to detect cell proliferation. (D) After knocking down YAP1 (shYAP1#1 and YAP1#2) in QBC939 cells, MTT assay was conducted to detect cell proliferation. Quantitations are presented as mean  $\pm$  SD. \*\*  $P < 0.01$ .

**Supplementary Fig. S3.** (A-B) Western blot assay was performed on QBC939 cells transfected with pLKO or shER $\alpha$  (A), and HuCCT1 cells transfected with pWPI or oeER $\alpha$  (B). (C) The qRT-PCR assay was performed on QBC939 cells transfected with Ctrl or miR16-5p inhibitor (right), and HuCCT1 cells transfected with pLKO or oemiR16-5p (left). (D) Cell proliferation and YAP1 expression altered after manipulating miR16-5p. Quantitations are presented as mean  $\pm$  SD. \*  $P < 0.05$ , \*\*  $P < 0.01$ .

**Supplementary Fig. S4.** (A) The ER $\alpha$  mRNA level was detected in Argonaute 2 (Ago2) complex using RIP assay in QBC939 cells with/without (w/wo) IDH1<sup>R132H</sup>. (B) ER $\alpha$  protein stability test in cycloheximide, CHX treated QBC939 cells carrying the IDH1 wild-type (WT) or mutation (MT). (C) After ER $\alpha$ -biotin pull-down, qRT-PCR was conducted to examine ER $\alpha$  expression from ER $\alpha$ -biotin complex. (D) After treating QBC939 cells w/wo R-2HG, anti-m6A antibody was used to pull-down the total m6A methylated RNA from two groups (E) The ER $\alpha$  mRNA level was detected in the anti-m6A complex using RIP assay in QBC939 cells carrying IDH1 WT or MT. (F) After over-expressing FTO (oeFTO) in HuCCT1 cells, MTT was conducted to examine cell growth. (G) After shRNA knockdown of FTO (shFTO#1, left, and shFTO#2, right) in QBC939 cells, MTT assay was conducted to examine cell growth. (H) The ER $\alpha$  mRNA sequence alignment near the stop codons with wild-type versus mutant of potential m6A modification sites. Quantitations are presented as mean  $\pm$  SD. \*  $P < 0.05$  and \*\*  $P < 0.01$ .

Table S1. Clinical data of Cholangiocarcinoma from TCGA

| sampleID            | gender | _EVENT | OS.time | histological_type                   | idh1/2<br>mutatio<br>n | Amino_A<br>cid_chan<br>ge | neoplasm_h<br>istologic_gr<br>ade | patho<br>logic_<br>M | patho<br>logic_<br>N | patho<br>logic_<br>T | patholo<br>gic_sta<br>ge | Er<br>α            | HIF-1<br>α          | GJA1                |
|---------------------|--------|--------|---------|-------------------------------------|------------------------|---------------------------|-----------------------------------|----------------------|----------------------|----------------------|--------------------------|--------------------|---------------------|---------------------|
| TCGA-3X-AAV<br>9-01 | MALE   | dead   | 339     | Cholangiocarcinoma; intrahepatic    | no                     | no                        | G2                                | M0                   | N0                   | T1                   | Stage I                  | 6.5<br>13<br>6     | 13.20<br>1205<br>01 | 11.60<br>3626<br>34 |
| TCGA-3X-AAV<br>A-01 | FEMALE | dead   | 445     | Cholangiocarcinoma; intrahepatic    | IDH2                   | p.R172S                   | G2                                | M0                   | NX                   | T2b                  | Stage II                 | 4.0<br>88<br>2     | 12.55<br>8659<br>87 | 9.682<br>9945<br>84 |
| TCGA-3X-AAV<br>B-01 | FEMALE | alive  | 402     | Cholangiocarcinoma; distal          | no                     | no                        | G1                                | M1                   | N1                   | T3                   | Stage<br>IVB             | 5.6<br>32<br>9     | 13.44<br>5920<br>13 | 12.46<br>6841<br>21 |
| TCGA-3X-AAV<br>C-01 | FEMALE | alive  | 709     | Cholangiocarcinoma; hilar/perihilar | no                     | no                        | G3                                | M0                   | N0                   | T1                   | Stage I                  | 3.1<br>97<br>8     | 11.84<br>5097<br>96 | 13.64<br>4982<br>86 |
| TCGA-3X-AAVE<br>-01 | MALE   | alive  | 650     | Cholangiocarcinoma; intrahepatic    | no                     | no                        | G2                                | M0                   | N0                   | T2                   | Stage II                 | 5.5<br>53<br>9     | 12.86<br>0505<br>06 | 9.491<br>8530<br>96 |
| TCGA-4G-AAZ<br>O-01 | FEMALE | alive  | 1177    | Cholangiocarcinoma; intrahepatic    | no                     | no                        | G2                                | M0                   | N0                   | T2a                  | Stage II                 | 2.8<br>10<br>2     | 12.61<br>6778<br>55 | 11.56<br>1287<br>95 |
| TCGA-4G-AAZ<br>T-01 | MALE   | alive  | 420     | Cholangiocarcinoma; intrahepatic    | no                     | no                        | G2                                | M0                   | N0                   | T1                   | Stage I                  | 10.68<br>3.6<br>49 | 10.94<br>4748<br>62 | 10.94<br>5443<br>84 |
| TCGA-W5-AA2<br>G-01 | FEMALE | alive  | 1976    | Cholangiocarcinoma; intrahepatic    | IDH1                   | p.R132C                   | G3                                | M0                   | N0                   | T1                   | Stage I                  | 7.6<br>75<br>7     | 12.48<br>6583<br>66 | 9.087<br>4628<br>41 |
| TCGA-W5-AA2<br>H-01 | FEMALE | alive  | 1077    | Cholangiocarcinoma; distal          | no                     | no                        | G3                                | M0                   | N0                   | T3                   | Stage<br>III             | 6.7<br>43<br>43    | 11.73<br>2167<br>43 | 9.906<br>8905<br>96 |
| TCGA-W5-AA2I<br>-01 | MALE   | dead   | 1939    | Cholangiocarcinoma; intrahepatic    | no                     | no                        | G2                                | M0                   | N0                   | T1                   | Stage I                  | 3.8<br>89<br>7     | 11.25<br>8566<br>03 | 6.672<br>4253<br>42 |

|             |        |       |      |                                         |      |         |    |    |    |     |              |     |       |       |
|-------------|--------|-------|------|-----------------------------------------|------|---------|----|----|----|-----|--------------|-----|-------|-------|
| TCGA-W5-AA2 |        |       |      |                                         |      |         |    |    |    |     |              | 6.0 | 12.65 | 8.569 |
| O-01        | MALE   | dead  | 640  | Cholangiocarcinom<br>a; intrahepatic    | IDH1 | p.R132C | G3 | M0 | N0 | T1  | Stage I      | 11  | 6871  | 8556  |
|             |        |       |      |                                         |      |         |    |    |    |     |              | 4   | 73    | 08    |
| TCGA-W5-AA2 |        |       |      |                                         |      |         |    |    |    |     |              | 3.5 | 13.83 | 10.34 |
| Q-01        | MALE   | alive | 50   | Cholangiocarcinom<br>a; intrahepatic    | no   | no      | G2 | M0 | N0 | T2b | Stage II     | 88  | 4471  | 4295  |
|             |        |       |      |                                         |      |         |    |    |    |     |              | 7   | 05    | 91    |
| TCGA-W5-AA2 |        |       |      |                                         |      |         |    |    |    |     |              | 5.2 | 12.58 | 9.231 |
| R-01        | FEMALE | alive | 1542 | Cholangiocarcinom<br>a; intrahepatic    | no   | no      | G3 | M0 | N0 | T1  | Stage I      | 30  | 3552  | 2211  |
|             |        |       |      |                                         |      |         |    |    |    |     |              | 5   | 93    | 81    |
| TCGA-W5-AA2 |        |       |      |                                         |      |         |    |    |    |     |              | 2.4 | 12.23 | 8.672 |
| T-01        | FEMALE | dead  | 1220 | Cholangiocarcinom<br>a; intrahepatic    | no   | no      | G3 | M0 | N0 | T2  | Stage II     | 21  | 9598  | 4253  |
|             |        |       |      |                                         |      |         |    |    |    |     |              | 8   | 53    | 42    |
| TCGA-W5-AA2 |        |       |      |                                         |      |         |    |    |    |     |              | 4.2 | 13.25 | 10.32 |
| U-01        | FEMALE | dead  | 627  | Cholangiocarcinom<br>a; intrahepatic    | no   | no      | G3 | M0 | N0 | T1  | Stage I      | 13  | 5766  | 3054  |
|             |        |       |      |                                         |      |         |    |    |    |     |              | 6   | 26    | 76    |
| TCGA-W5-AA2 |        |       |      |                                         |      |         |    |    |    |     |              | 2.8 | 14.17 | 9.172 |
| W-01        | FEMALE | dead  | 924  | Cholangiocarcinom<br>a; intrahepatic    | no   | no      | G3 | M0 | N1 | T2a | Stage<br>IVA | 86  | 6406  | 4275  |
|             |        |       |      |                                         |      |         |    |    |    |     |              | 7   | 93    | 09    |
| TCGA-W5-AA2 |        |       |      |                                         |      |         |    |    |    |     |              | 6.2 | 12.45 | 11.55 |
| X-01        | MALE   | dead  | 271  | Cholangiocarcinom<br>a; hilar/perihilar | no   | no      | G4 | M1 | N1 | T2b | Stage<br>IVB | 76  | 9431  | 0265  |
|             |        |       |      |                                         |      |         |    |    |    |     |              | 9   | 62    | 81    |
| TCGA-W5-AA2 |        |       |      |                                         |      |         |    |    |    |     |              | 4.2 | 14.41 | 10.72 |
| Z-01        | FEMALE | alive | 1614 | Cholangiocarcinom<br>a; intrahepatic    | no   | no      | G3 | M0 | N0 | T2  | Stage II     | 34  | 7193  | 7069  |
|             |        |       |      |                                         |      |         |    |    |    |     |              |     | 24    | 56    |
| TCGA-W5-AA3 |        |       |      |                                         |      |         |    |    |    |     |              | 4.6 | 12.20 | 10.38 |
| 0-01        | MALE   | alive | 1153 | Cholangiocarcinom<br>a; intrahepatic    | no   | no      | G3 | M0 | N0 | T1  | Stage I      | 96  | 5182  | 1542  |
|             |        |       |      |                                         |      |         |    |    |    |     |              | 4   | 33    | 95    |
| TCGA-W5-AA3 |        |       |      |                                         |      |         |    |    |    |     |              | 6.7 | 13.08 | 10.36 |
| 1-01        | MALE   | alive | 10   | Cholangiocarcinom<br>a; intrahepatic    | no   | no      | G3 | M0 | N0 | T1  | Stage I      | 89  | 8622  | 9597  |
|             |        |       |      |                                         |      |         |    |    |    |     |              | 2   | 63    | 35    |
| TCGA-W5-AA3 |        |       |      |                                         |      |         |    |    |    |     |              | 6.4 | 13.45 | 10.77 |
| 3-01        | MALE   | alive | 1449 | Cholangiocarcinom<br>a; intrahepatic    | no   | no      | G3 | M0 | N0 | T1  | Stage I      | 72  | 5584  | 6433  |
|             |        |       |      |                                         |      |         |    |    |    |     |              | 5   | 09    | 03    |

|                     |        |       |      |                                     |      |         |    |    |    |     |           |            |               |               |
|---------------------|--------|-------|------|-------------------------------------|------|---------|----|----|----|-----|-----------|------------|---------------|---------------|
| TCGA-W5-AA3<br>4-01 | FEMALE | dead  | 555  | Cholangiocarcinoma; intrahepatic    | IDH1 | p.R132C | G2 | M0 | N0 | T1  | Stage I   | 3.2<br>82  | 11.94<br>3247 | 8.930<br>7373 |
|                     |        |       |      |                                     |      |         |    |    |    |     |           |            | 4             | 38            |
| TCGA-W5-AA3<br>6-01 | FEMALE | dead  | 1402 | Cholangiocarcinoma; hilar/perihilar | IDH1 | p.R132S | G3 | M1 | N0 | T3  | Stage IV  | 1.9<br>56  | 11.94<br>6175 | 8.980<br>1395 |
|                     |        |       |      |                                     |      |         |    |    |    |     |           |            | 1             | 24            |
| TCGA-W5-AA3<br>8-01 | FEMALE | alive | 1471 | Cholangiocarcinoma; intrahepatic    | no   | no      | G3 | M0 | N0 | T1  | Stage I   | 3.3<br>62  | 2040          | 3903          |
|                     |        |       |      |                                     |      |         |    |    |    |     |           |            | 51            | 55            |
| TCGA-W5-AA3<br>9-01 | MALE   | dead  | 170  | Cholangiocarcinoma; intrahepatic    | no   | no      | G4 | M0 | N0 | T2  | Stage II  | 4.7<br>95  | 10.74<br>1466 | 7.851<br>7490 |
|                     |        |       |      |                                     |      |         |    |    |    |     |           |            | 7             | 99            |
| TCGA-W6-AA0<br>S-01 | FEMALE | alive | 808  | Cholangiocarcinoma; intrahepatic    | no   | no      | G2 | MX | N0 | T1  | Stage I   | 3.8<br>82  | 14.58<br>3141 | 9.887<br>2206 |
|                     |        |       |      |                                     |      |         |    |    |    |     |           |            | 2             | 55            |
| TCGA-WD-A7R<br>X-01 | FEMALE | dead  | 21   | Cholangiocarcinoma; intrahepatic    | no   | no      | G2 | MX | NX | T2b | Stage II  | 6.6<br>18  | 12.58<br>5432 | 9.519<br>6362 |
|                     |        |       |      |                                     |      |         |    |    |    |     |           |            | 3             | 05            |
| TCGA-YR-A95A<br>-01 | MALE   | dead  | 26   | Cholangiocarcinoma; hilar/perihilar | IDH1 | p.R132C | G2 | M1 | NX | T2  | Stage IV  | 3.0<br>6.0 | 13.26<br>8103 | 13.87<br>6708 |
|                     |        |       |      |                                     |      |         |    |    |    |     |           |            | 73            | 34            |
| TCGA-ZD-A8I3<br>-01 | FEMALE | dead  | 169  | Cholangiocarcinoma; intrahepatic    | no   | no      | G3 | M0 | N0 | T2  | Stage II  | 3.0<br>49  | 13.67<br>3198 | 10.20<br>8234 |
|                     |        |       |      |                                     |      |         |    |    |    |     |           |            | 9             | 64            |
| TCGA-ZH-A8Y1<br>-01 | FEMALE | dead  | 385  | Cholangiocarcinoma; intrahepatic    | no   | no      | G2 | M0 | N1 | T3  | Stage IVA | 3.4<br>00  | 13.45<br>9303 | 10.83<br>7627 |
|                     |        |       |      |                                     |      |         |    |    |    |     |           |            | 2             | 53            |
| TCGA-ZH-A8Y2<br>-01 | FEMALE | dead  | 701  | Cholangiocarcinoma; intrahepatic    | no   | no      | G2 | M0 | NX | T1  | Stage I   | 3.3<br>83  | 12.48<br>0032 | 8.087<br>4628 |
|                     |        |       |      |                                     |      |         |    |    |    |     |           |            | 4             | 81            |
| TCGA-ZH-A8Y4<br>-01 | MALE   | dead  | 741  | Cholangiocarcinoma; intrahepatic    | no   | no      | G3 | M0 | N0 | T1  | Stage I   | 4.7<br>11  | 13.75<br>4365 | 8.851<br>7490 |
|                     |        |       |      |                                     |      |         |    |    |    |     |           |            | 2             | 6             |
| TCGA-ZH-A8Y5<br>-01 | MALE   | alive | 1229 | Cholangiocarcinoma; intrahepatic    | no   | no      | G3 | M1 | N1 | T3  | Stage IVB | 2.9<br>71  | 13.15<br>1967 | 9.933<br>6906 |

|                   |        |       |     |                                  |    |    |    |    |    |     |             |                |                      |                      |
|-------------------|--------|-------|-----|----------------------------------|----|----|----|----|----|-----|-------------|----------------|----------------------|----------------------|
|                   |        |       |     |                                  |    |    |    |    |    |     |             |                | 87                   | 55                   |
| TCGA-ZH-A8Y6-01   | FEMALE | alive | 519 | Cholangiocarcinoma; intrahepatic | no | no | G2 | M0 | N0 | T1  | Stage I     | 5.1<br>35<br>4 | 16.03<br>8404<br>63  | 10.16<br>4906<br>93  |
| TCGA-ZH-A8Y8-01   | MALE   | alive | 602 | Cholangiocarcinoma; intrahepatic | no | no | G2 | M0 | N0 | T1  | Stage I     | 5.3<br>54<br>7 | 12.81<br>4782<br>72  | 14.20<br>3271<br>52  |
| TCGA-ZU-A8S4-01   | MALE   | dead  | 98  | Cholangiocarcinoma; intrahepatic | no | no | G3 | MX | NX | T1  | Stage I     | 4.6<br>39<br>9 | 13.30<br>4636<br>52  | 13.78<br>0334<br>71  |
| TCGA-UB-A7M A-01A | female | alive |     | Hepatobiliary carcinoma (Mixed)  | no | no | G2 | M0 | N0 | T2b | stage ii    | 5.8<br>83<br>6 | #N/A<br>#N/A<br>#N/A | #N/A<br>#N/A<br>#N/A |
| TCGA-ED-A97K-01A  | male   | alive | 6   | Hepatobiliary carcinoma (Mixed)  | no | no | G2 | M0 | N0 | T3a | stage iiiia | 7.1<br>39<br>3 | #N/A<br>#N/A<br>#N/A | #N/A<br>#N/A<br>#N/A |
| TCGA-K7-AAU 7-01A | male   | alive | 359 | Hepatobiliary carcinoma (Mixed)  | no | no | G2 | MX | NX | T2a | stage ii    | 4.9<br>41<br>8 | #N/A<br>#N/A<br>#N/A | #N/A<br>#N/A<br>#N/A |
| TCGA-DD-AA3 A-01A | female | dead  | 410 | Hepatobiliary carcinoma (Mixed)  | no | no | G4 | MX | N0 | T1  | stage i     | 3.4<br>23<br>3 | #N/A<br>#N/A<br>#N/A | #N/A<br>#N/A<br>#N/A |
| TCGA-5C-AAP D-01A | male   | alive | 20  | Hepatobiliary carcinoma (Mixed)  | no | no | G1 | M0 | N0 | T2  | stage ii    | 4.9<br>09<br>4 | #N/A<br>#N/A<br>#N/A | #N/A<br>#N/A<br>#N/A |
| TCGA-FV-A310-01A  | female | alive | 848 | Hepatobiliary carcinoma (Mixed)  | no | no | G2 | M0 | NX | T2  | stage ii    | 2.8<br>99      | #N/A<br>#N/A         | #N/A<br>#N/A         |
| TCGA-KR-A7K2-01A  | male   | alive |     | Hepatobiliary carcinoma (Mixed)  | no | no | G1 | M0 | N0 | T1  | stage i     | 8.7<br>35<br>3 | #N/A<br>#N/A<br>#N/A | #N/A<br>#N/A<br>#N/A |

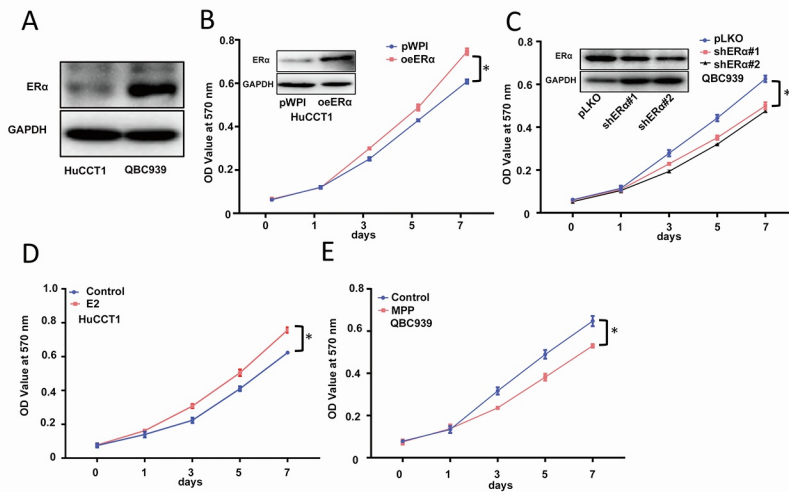

Supplementary Figure 1



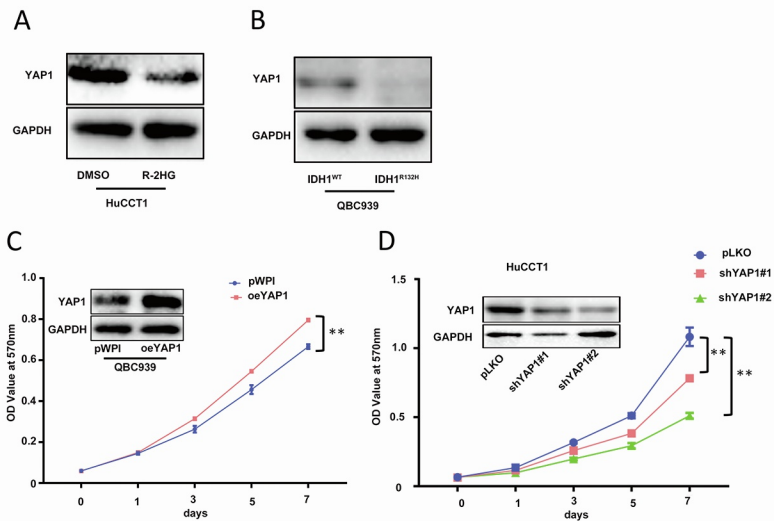

Supplementary Figure 2

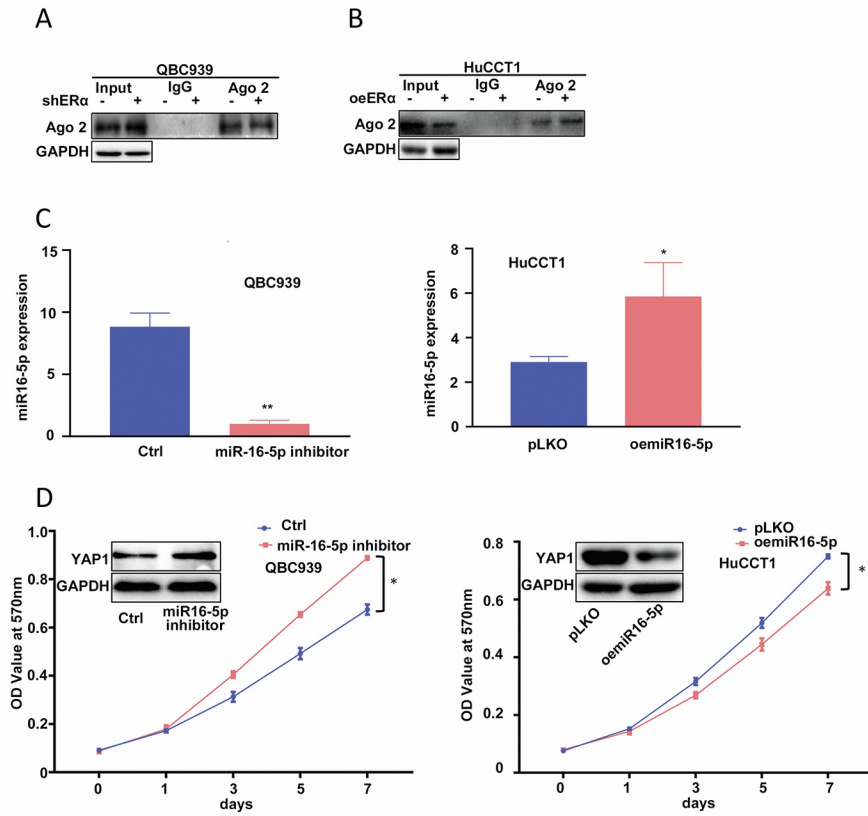

Supplementary Figure 3

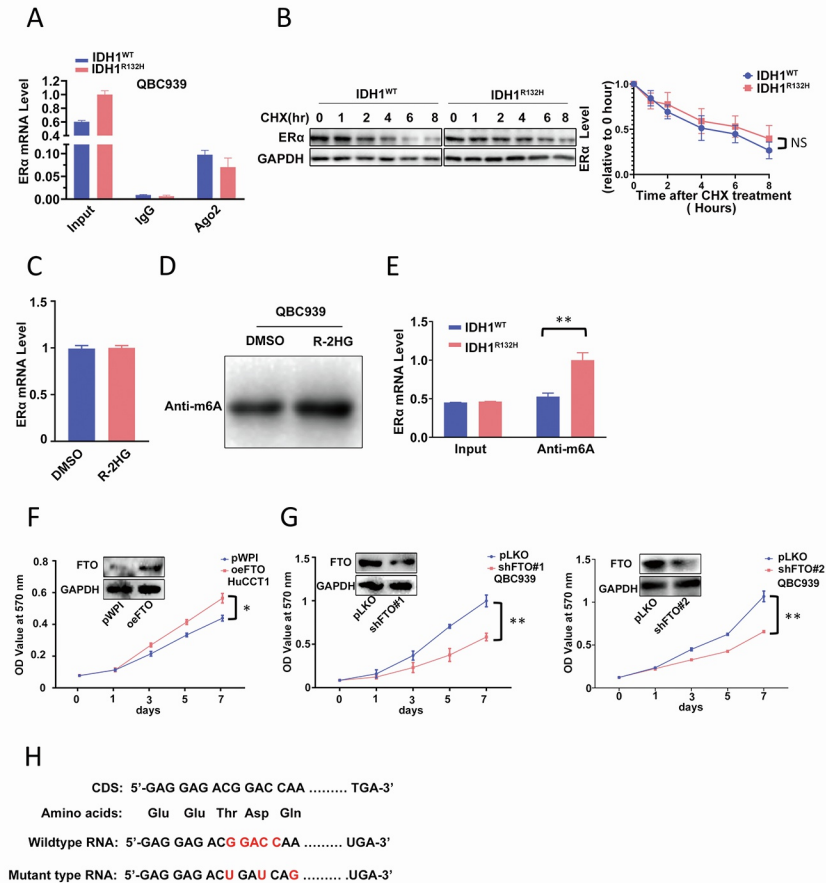

Supplementary Figure 4
